# Supplementary material for: Endophytic Fungal Communities Associated with Vascular Plants in the High Arctic Zone Are Highly Diverse and Host-Plant Specific
Source: PubMed Central journal article supplement (PMC4466372; doi:10.1371/journal.pone.0130051), 2015-06-12
Supplement: pone.0130051.s001.pdf [file pone.0130051.s001.pdf]

**S1 Table. Overview of the OTUs found in the 12 plant samples, including their frequency, number of reads and BLASTn top hits with accession numbers in GenBank.**

| OTU ID | Freq. | Reads | phylum        | Order               | Family               | Identification                              | Close GenBank match / Accession               | Similarity   | Originally reported habitat                                                                            |
|--------|-------|-------|---------------|---------------------|----------------------|---------------------------------------------|-----------------------------------------------|--------------|--------------------------------------------------------------------------------------------------------|
| OTU 1  | 10    | 779   | Basidiomycota | Cystofilobasidiales | Cystofilobasidiaceae | <i>Mrakia frigida</i> <sup>a</sup>          | <i>Mrakia frigida</i> AJ866977                | 99%(476/480) | Sediment in Russia (Siberia)                                                                           |
| OTU 2  | 4     | 5226  | Ascomycota    | Venturiales         | Venturiaceae         | <i>Rhizosphaera macrospora</i> <sup>a</sup> | <i>Rhizosphaera macrospora</i> AF462431       | 97%(466/481) | Fungal conifer pathogens ( <i>Abies alba</i> ) in France                                               |
| OTU 3  | 2     | 5     | Ascomycota    | Helotiales          | Unassigned           | Helotiales sp.                              | Uncultured fungus clone GU174334              | 94%(492/521) | Forest floor ( <i>Acer saccharum</i> ) in USA: Michigan, Manistee National Forest (43.6687N; 86.1431W) |
|        |       |       |               |                     |                      |                                             | Uncultured Helotiales clone EU726288          | 93%(433/465) | Plant ( <i>Pinus ponderosa</i> ) in California woodland                                                |
| OTU 4  | 2     | 5     | Basidiomycota | Agaricostilbales    | Agaricostilbaceae    | Agaricostilbaceae sp.                       | <i>Bensingtonia sorbi</i> AY233343            | 90%(415/463) | Unreported                                                                                             |
| OTU 5  | 1     | 16    | Ascomycota    | Helotiales          | Unassigned           | Helotiales sp.                              | Uncultured <i>Tetracladium</i> clone KC694156 | 93%(428/462) | Plant roots ( <i>Triticum aestivum</i> ) in Sweden                                                     |
| OTU 6  | 6     | 469   | Ascomycota    | Xylariales          | Amphisphaeriaceae    | <i>Seematosporium</i> sp. <sup>b</sup>      | <i>Seematosporium walkeri</i> JN871207        | 95%(509/534) | Plant ( <i>Eucalyptus</i> sp.) in Australia (Victoria)                                                 |
| OTU 7  | 1     | 11    | Ascomycota    | Chaetothyriales     | Unassigned           | Chaetothyriales sp.                         | Uncultured fungus clone KF274490              | 88%(343/388) | Wood stump ( <i>Picea abies</i> ) in Finland                                                           |
|        |       |       |               |                     |                      |                                             | <i>Rhinocladia</i> sp. EU139138               | 89%(336/379) | Lichen Umbilicariales in China (Hebei)                                                                 |
| OTU 8  | 2     | 4     | Basidiomycota | Tremellales         | Unassigned           | Tremellales sp.                             | Uncultured fungus clone JX383662              | 89%(337/379) | Soil in USA                                                                                            |
|        |       |       |               |                     |                      |                                             | Uncultured Tremellales clone GU327507         | 96%(238/249) | Mycorrhizal seedling of <i>Epipactis helleborine</i> in Czech                                          |
| OTU 9  | 3     | 142   | Ascomycota    | Chaetothyriales     | Herpotrichiellaceae  | Herpotrichiellaceae sp.                     | Herpotrichiellaceae sp. KF636410              | 94%(306/327) | Liverwort ( <i>Barbilophozia hatcheri</i> ) in Antarctica                                              |
| OTU 10 | 1     | 70    | Ascomycota    | Unassigned          | Unassigned           | Ascomycota sp.                              | Uncultured fungus clone KC965841              | 95%(390/410) | Arctic soil in USA (69.67N; 148.72W)                                                                   |
|        |       |       |               |                     |                      |                                             | <i>Cyphellophora laciniata</i> NR121335       | 86%(361/419) | Skin of <i>Homo sapiens</i> in Switzerland                                                             |
| OTU 11 | 4     | 30    | Basidiomycota | Unassigned          | Unassigned           | Basidiomycota sp.                           | Uncultured fungus clone KF800411              | 84%(467/556) | House dust in USA (Missouri, Kansas City)                                                              |
|        |       |       |               |                     |                      |                                             | <i>Mrakia blollopis</i> AB916516              | 83%(447/541) | Arctic bird feather in Norway                                                                          |
| OTU 12 | 2     | 2     | Basidiomycota | Tremellales         | Unassigned           | Tremellales sp.                             | Uncultured fungus clone KF274456              | 95%(352/369) | <i>Picea abies</i> stumps in Finland                                                                   |
|        |       |       |               |                     |                      |                                             | Uncultured Tremellales clone JF449484         | 99%(308/309) | Beech litter in Austria (Tyrol:Achenkirch)                                                             |
| OTU 13 | 1     | 2     | Basidiomycota | Unassigned          | Unassigned           | Basidiomycota sp.                           | Uncultured fungus clone KF274089              | 87%(432/496) | <i>Picea abies</i> stumps in Finland                                                                   |
|        |       |       |               |                     |                      |                                             | <i>Rhodotorula</i> sp. FN548148               | 87%(433/497) | Living surface-sterilised leaves of <i>Fagus sylvatica</i> in Germany                                  |

| OTU ID | Freq. | Reads | phylum        | Order               | Family               | Identification                         | Close GenBank match / Accession                   | Similarity          | Originally reported habitat                                                                            |
|--------|-------|-------|---------------|---------------------|----------------------|----------------------------------------|---------------------------------------------------|---------------------|--------------------------------------------------------------------------------------------------------|
|        |       |       |               |                     |                      |                                        |                                                   |                     | (City of Greifswald, nature conservation area Eisenhain)                                               |
| OTU 14 | 1     | 4     | Ascomycota    | Chaetothiales       | Herpotrichiaceae     | Herpotrichiaceae sp.                   | <i>Cladophialophora minutissima</i> EF016383      | 94%(422/447)        | Unreported                                                                                             |
| OTU 15 | 2     | 152   | Ascomycota    | Pleosporales        | Leptosphaeriaceae    | <i>Leptosphaeria</i> sp. <sup>b</sup>  | Uncultured <i>Leptosphaeria</i> clone EU852362    | <b>97%(265/272)</b> | Plant ( <i>Fraxinus excelsior</i> ) in Sweden                                                          |
| OTU 16 | 1     | 17    | Ascomycota    | Unassigned          | Unassigned           | Ascomycota sp.                         | Uncultured soil fungus clone GU083291             | 93%(298/322)        | Soil in USA (Alaska)                                                                                   |
|        |       |       |               |                     |                      |                                        | Uncultured Sebaciales clone FJ788795              | 87%(317/364)        | Mycorrhizal root section of <i>Pterygodium caffrum</i>                                                 |
| OTU 17 | 1     | 3     | Ascomycota    | Unassigned          | Unassigned           | Ascomycota sp.                         | Uncultured fungus clone KC965419                  | 99%(465/468)        | Arctic soil in USA (69.67N; 148.72W)                                                                   |
|        |       |       |               |                     |                      |                                        | <i>Pseudocercospora nephrolepidicola</i> HQ599590 | 85%(347/406)        | On leaves of <i>Nephrolepis falcata</i> in Australia                                                   |
| OTU 18 | 7     | 247   | Basidiomycota | Cystofilobasidiales | Cystofilobasidiaceae | <i>Mrakia</i> sp. <sup>b</sup>         | Uncultured <i>Mrakia</i> isolate GU931743         | <b>99%(514/516)</b> | House dust in Canada (45.2556N; 75.9204W)                                                              |
| OTU 19 | 3     | 57    | Ascomycota    | Helotiales          | Rutstroemiaceae      | Rutstroemiaceae sp.                    | <i>Lambertella</i> sp. AB705255                   | 94%(485/517)        | Unreported                                                                                             |
| OTU 20 | 2     | 129   | Ascomycota    | Helotiales          | Unassigned           | <i>Tetracladium</i> sp. <sup>b</sup>   | Uncultured <i>Tetracladium</i> clone KC694156     | <b>97%(494/507)</b> | Roots of <i>Triticum aestivum</i> in Sweden                                                            |
| OTU 21 | 1     | 4     | Ascomycota    | Helotiales          | Unassigned           | Helotiales sp.                         | Uncultured mycorrhizal fungus AB669661            | <b>99%(467/472)</b> | Unreported                                                                                             |
|        |       |       |               |                     |                      |                                        | Uncultured Helotiales clone KC455325              | <b>99%(449/451)</b> | Root system in Arctic tundra (USA: Anaktuvuk River Fire, AK)                                           |
| OTU 22 | 7     | 624   | Ascomycota    | Unassigned          | Unassigned           | <i>Oleoguttula</i> sp. <sup>b</sup>    | Uncultured fungus clone KC966025                  | 96%(496/515)        | Arctic soil in Canada (76.23N; 119.30W)                                                                |
|        |       |       |               |                     |                      |                                        | <i>Oleoguttula mirabilis</i> KF309972             | 96%(448/468)        | Unreported                                                                                             |
| OTU 23 | 1     | 3     | Basidiomycota | Tremellales         | Unassigned           | <i>Cryptococcus</i> sp. <sup>b</sup>   | Uncultured Basidiomycota clone GU328524           | 97%(478/494)        | Oe layer in Forest                                                                                     |
|        |       |       |               |                     |                      |                                        | <i>Cryptococcus</i> sp. HG324303                  | 96%(440/456)        | Soil in Germany (Biosphere area Schwaebische Alb)                                                      |
| OTU 24 | 3     | 10    | Ascomycota    | Helotiales          | Helotiaceae          | <i>Articulospora</i> sp. <sup>b</sup>  | <i>Articulospora tetracladia</i> EU998929         | 95%(315/332)        | Unreported                                                                                             |
| OTU 25 | 2     | 61    | Ascomycota    | Unassigned          | Unassigned           | Ascomycota sp.                         | Uncultured ascomycete clone AM901772              | 91%(464/510)        | House dust in Finland                                                                                  |
| OTU 26 | 5     | 534   | Ascomycota    | Capnodiales         | Unassigned           | Capnodiales sp.                        | Uncultured fungus clone KC965669                  | <b>98%(480/490)</b> | Arctic soil in USA (69.15N; 148.85W)                                                                   |
|        |       |       |               |                     |                      |                                        | <i>Penidiella ellipsoidea</i> JF499843            | 91%(471/518)        | Leaf bracts ( <i>Phaenocoma proliifera</i> ) in South Africa                                           |
| OTU 27 | 2     | 37    | Ascomycota    | Microascales        | Halosphaeriaceae     | <i>Monodictys arctica</i> <sup>a</sup> | Uncultured fungus clone GU817175                  | <b>97%(239/302)</b> | Root systems of <i>Bistorta vivipara</i> in Norway (Svalbard Midtre Lovenbreen) (78.90555N; 12.08450E) |
|        |       |       |               |                     |                      |                                        | <i>Monodictys arctica</i> EU686522                | <b>97%(291/299)</b> | Roots of <i>Saxifraga oppositifolia</i> in Canadian High Arctic                                        |
| OTU 28 | 10    | 1968  | Basidiomycota | Tremellales         | Unassigned           | <i>Cryptococcus</i> sp. <sup>b</sup>   | Uncultured <i>Cryptococcus</i> clone KC753413     | <b>99%(491/496)</b> | Plant ( <i>Triticum aestivum</i> ) stem in Sweden                                                      |

| OTU ID | Freq. | Reads | phylum        | Order           | Family             | Identification                               | Close GenBank match / Accession                 | Similarity          | Originally reported habitat                                                             |
|--------|-------|-------|---------------|-----------------|--------------------|----------------------------------------------|-------------------------------------------------|---------------------|-----------------------------------------------------------------------------------------|
| OTU 29 | 1     | 7     | Unassigned    | Unassigned      | Unassigned         | Fungus sp.                                   | Uncultured fungus clone KF297272                | <b>99%(462/467)</b> | Arctic soil in Canada (76.23N; 119.30W)                                                 |
| OTU 30 | 5     | 277   | Ascomycota    | Pleosporales    | Melanommataceae    | <i>Herpotrichia</i> sp. <sup>b</sup>         | Fungal sp. KF527818                             | 96%(368/384)        | Plant ( <i>Carex bigelowii</i> ) root in Finland                                        |
|        |       |       |               |                 |                    |                                              | <i>Herpotrichia juniperi</i> JX981496           | 96% (334/348)       | Plant in Poland                                                                         |
| OTU 31 | 8     | 258   | Basidiomycota | Tremellales     | Unassigned         | Basidiomycota sp.                            | Uncultured <i>Cryptococcus</i> clone KC753413   | <b>99%(213/216)</b> | Plant stem ( <i>Triticum aestivum</i> ) in Sweden                                       |
| OTU 32 | 6     | 104   | Ascomycota    | Capnodiales     | Davidiellaceae     | <i>Cladosporium</i> sp. <sup>b</sup>         | <i>Cladosporium</i> sp. KF367501                | <b>99%(561/562)</b> | Untreated drinking water sources in Portugal                                            |
| OTU 33 | 3     | 455   | Ascomycota    | Helotiales      | Unassigned         | Helotiales sp.                               | Uncultured <i>Helicodendron</i> clone GU931747  | 92%(347/376)        | House dust in Canada (45.2556 N, 75.9204W)                                              |
| OTU 34 | 3     | 629   | Ascomycota    | Capnodiales     | Unassigned         | Capnodiales sp.                              | <i>Catenulostroma protearum</i> GU214628        | 89%(511/571)        | Plant ( <i>Hakea sericea</i> ) in South Africa                                          |
| OTU 35 | 2     | 13    | Ascomycota    | Chaetothiriales | Unassigned         | Chaetothiriales sp.                          | Uncultured fungus clone KC965234                | 96%(494/513)        | Arctic soil in Canada (76.23N; 119.30W)                                                 |
|        |       |       |               |                 |                    |                                              | Herpotrichiellaceae sp. JQ272383                | 87%(473/541)        | USA (GRSMNP, Laurel Falls)                                                              |
| OTU 36 | 5     | 201   | Ascomycota    | Helotiales      | Hyaloscyphaceae    | <i>Mycoarthritis corallinus</i> <sup>a</sup> | Uncultured Helotiales isolate GU931728          | <b>97%(487/500)</b> | House dust in Canada (45.2556N; 75.9204W)                                               |
|        |       |       |               |                 |                    |                                              | <i>Mycoarthritis corallinus</i> AF128440        | <b>97%(460/473)</b> | Unreported                                                                              |
| OTU 37 | 2     | 42    | Ascomycota    | Capnodiales     | Teratosphaeriaceae | Teratosphaeriaceae sp.                       | Uncultured fungus clone KF296855                | <b>99%(413/417)</b> | Arctic soil in Canada (78.78N; 103.55W)                                                 |
|        |       |       |               |                 |                    |                                              | <i>Teratosphaeria jonkershoekensis</i> EU707864 | 91%(402/441)        | Plant ( <i>Protea</i> sp.) leaf in South Africa                                         |
| OTU 38 | 2     | 435   | Ascomycota    | Helotiales      | Unassigned         | <i>Tetracladium</i> sp. <sup>b</sup>         | Uncultured <i>Tetracladium</i> clone GU327472   | <b>97%(517/533)</b> | Mycorrhizal seedling ( <i>Epipactis atrorubens</i> ) in Czech (Lednice)                 |
| OTU 39 | 7     | 881   | Ascomycota    | Pleosporales    | Unassigned         | Pleosporales sp.                             | Fungal sp. JX978255                             | <b>97%(420/431)</b> | 2 or 3 year-old twig tissue from adult narrowleaf cottonwood growing in a common garden |
|        |       |       |               |                 |                    |                                              | Pleosporales sp. AB751503                       | 96% (394/411)       | Unreported                                                                              |
| OTU 40 | 2     | 342   | Basidiomycota | Sebacinales     | Sebacinaceae       | <i>Sebacina</i> sp. <sup>b</sup>             | Uncultured <i>Sebacina</i> clone JQ420971       | <b>99%(499/503)</b> | Plant species <i>Vaccinium myrtillus</i>                                                |
| OTU 41 | 2     | 2     | Ascomycota    | Dothideales     | Dothioraceae       | Dothioraceae sp.                             | Uncultured fungus clone KF274441                | 93%(412/443)        | <i>Picea abies</i> stumps in Finland                                                    |
|        |       |       |               |                 |                    |                                              | <i>Aureobasidium</i> sp. KJ690089               | 91%(402/442)        | Ectomycorrhize of <i>Eucalyptus camaldulensis</i>                                       |
| OTU 42 | 2     | 705   | Ascomycota    | Xylariales      | Amphisphaeriaceae  | Amphisphaeriaceae sp.                        | Uncultured fungus clone KC966357                | <b>99%(518/519)</b> | Arctic soil in Canada (73.22N; 119.56W)                                                 |
|        |       |       |               |                 |                    |                                              | <i>Discosia pseudoartocreas</i> KF777161        | 93%(415/448)        | Plant leaves ( <i>Tilia</i> sp.) in Austria (Innsbruck)                                 |
| OTU 43 | 1     | 9     | Ascomycota    | Pleosporales    | Leptosphaeriaceae  | Leptosphaeriaceae sp.                        | Uncultured fungus clone KF742590                | 89%(385/432)        | Imprted asymptomatic live woody plant ( <i>Berberis</i> ) material in                   |

| OTU ID | Freq. | Reads | phylum        | Order               | Family               | Identification                                    | Close GenBank match / Accession               | Similarity           | Originally reported habitat                                                                                          |
|--------|-------|-------|---------------|---------------------|----------------------|---------------------------------------------------|-----------------------------------------------|----------------------|----------------------------------------------------------------------------------------------------------------------|
|        |       |       |               |                     |                      |                                                   |                                               |                      | USA                                                                                                                  |
|        |       |       |               |                     |                      |                                                   | <i>Leptosphaeria contecta</i> AF181702        | 92%(277/300)         | Unreported                                                                                                           |
| OTU 44 | 5     | 26    | Ascomycota    | Capnodiales         | Cladosporiaceae      | <i>Rachicladosporium monterosium</i> <sup>a</sup> | Uncultured fungus clone KC966122              | <b>97%(511/526)</b>  | Arctic soil in USA (69.67N;148.72W)                                                                                  |
|        |       |       |               |                     |                      |                                                   | <i>Rachicladosporium monterosium</i> KF309940 | <b>97% (403/416)</b> | Unreported                                                                                                           |
| OTU 45 | 2     | 92    | Ascomycota    | Capnodiales         | Teratosphaeriaceae   | Teratosphaeriaceae                                | <i>Teratosphaeria alistairi</i> JX556227      | 93%(358/385)         | Leaves ( <i>Protea repens</i> ) in South Africa (Hermaanus)                                                          |
| OTU 46 | 1     | 2     | Basidiomycota | Thelephorales       | Thelephoraceae       | <i>Tomentella</i> sp. <sup>b</sup>                | <i>Tomentella</i> sp. JQ711817                | <b>98%(450/461)</b>  | Ectomycorrhiza ( <i>Pinus contorta</i> ) in Canada (55.45N; 123.20W)                                                 |
| OTU 47 | 1     | 13    | Ascomycota    | Diaporthales        | Gnomoniaceae         | <i>Apiognomonia cf. errabunda</i> <sup>a</sup>    | <i>Apiognomonia cf. errabunda</i> FN548166    | <b>99%(531/536)</b>  | Living surface-sterilised leaves of <i>Fagus sylvatica</i> in Switzerland: Hofstetten near Basle, Swiss Canopy Crane |
| OTU 48 | 3     | 57    | Ascomycota    | Helotiales          | Helotiaceae          | Helotiaceae sp.                                   | <i>Claussenomyces</i> sp. HQ533008            | 94%(503/533)         | New Zealand                                                                                                          |
| OTU 49 | 3     | 201   | Basidiomycota | Cystofilobasidiales | Cystofilobasidiaceae | <i>Udeniomyces</i> sp. <sup>b</sup>               | Uncultured <i>Udeniomyces</i> clone KC753422  | <b>99%(521/527)</b>  | Plant ( <i>Triticum aestivum</i> ) stem in sweden                                                                    |
| OTU 50 | 4     | 71    | Ascomycota    | Pleosporales        | Phaeosphaeriaceae    | <i>Phaeosphaeria juncophila</i> <sup>a</sup>      | Uncultured fungus clone FJ820772              | <b>99%(501/504)</b>  | Air sample in Germany                                                                                                |
|        |       |       |               |                     |                      |                                                   | <i>Phaeosphaeria juncophila</i> AF439488      | <b>99%(456/458)</b>  | Plant ( <i>Juncus articulatus</i> ) in Switzerland                                                                   |
| OTU 51 | 1     | 84    | Ascomycota    | Xylariales          | Amphisphaeriaceae    | Amphisphaeriaceae sp.                             | Uncultured fungus clone KC966357              | <b>97%(392/405)</b>  | Arctic soil in Canada (73.22N; 119.56W)                                                                              |
|        |       |       |               |                     |                      |                                                   | <i>Discosia pseudoartocreas</i> KF777161      | 92%(396/432)         | Plant leaves ( <i>Tilia</i> sp.) in Austria (Innsbruck)                                                              |
| OTU 52 | 1     | 4     | Ascomycota    | Pleosporales        | Lophiostomataceae    | <i>Lophiostoma</i> sp. <sup>b</sup>               | Uncultured soil fungus clone DQ420814         | <b>98%(495/505)</b>  | Soil in USA (Cedar Creek, Minnesota)                                                                                 |
|        |       |       |               |                     |                      |                                                   | <i>Lophiostoma arundinis</i> AJ496633         | 96%(484/503)         | Plant                                                                                                                |
| OTU 53 | 2     | 47    | Basidiomycota | Leucosporidiales    | Leucosporidiaceae    | <i>Leucosporidiella muscorum</i> <sup>a</sup>     | <i>Leucosporidiella muscorum</i> FR717869     | <b>99%(488/491)</b>  | Plant ( <i>Paxillus involutus</i> ) in Germany (51.5N; 11.94E)                                                       |
| OTU 54 | 3     | 1627  | Ascomycota    | Helotiales          | Unassigned           | <i>Leptodontidium</i> sp. <sup>b</sup>            | Uncultured soil fungus clone EU490132         | <b>97%(504/522)</b>  | Savanna soil under mesquite ( <i>Prosopis glandulosa</i> ) in USA (33.85 N; 99.44 W)                                 |
|        |       |       |               |                     |                      |                                                   | <i>Leptodontidium orchidicola</i> KF646097    | 96%(501/522)         | Plant root of <i>Rosa rugosa</i> in Lithuania                                                                        |
| OTU 55 | 1     | 2     | Ascomycota    | Capnodiales         | Cladosporiaceae      | Cladosporiaceae sp.                               | Uncultured fungus clone KC965721              | 95%(483/511)         | Arctic soil in Canada (78.78N;103.55W)                                                                               |
|        |       |       |               |                     |                      |                                                   | <i>Rachicladosporium pini</i> JF951145        | 91%(490/541)         | Plant neeles ( <i>Pinus monophylla</i> ) in Netherland                                                               |
| OTU 56 | 1     | 7     | Ascomycota    | Capnodiales         | Unassigned           | <i>Capnocheirides</i> sp. <sup>b</sup>            | <i>Capnocheirides</i> sp. FR871188            | 97%(428/442)         | Leaf of <i>Rhododendron</i>                                                                                          |

| OTU ID | Freq. | Reads | phylum        | Order        | Family            | Identification                               | Close GenBank match / Accession                | Similarity           | Originally reported habitat                                                                                                   |
|--------|-------|-------|---------------|--------------|-------------------|----------------------------------------------|------------------------------------------------|----------------------|-------------------------------------------------------------------------------------------------------------------------------|
| OTU 57 | 1     | 350   | Ascomycota    | Pleosporales | Pleosporaceae     | Pleosporaceae sp.                            | Uncultured mycorrhizal fungus clone AY929129   | 94%(490/519)         | Root of <i>Stipa hymenoides</i> in semi-arid grassland (USA:Virginia Park, Canyonlands National Part, UT)                     |
|        |       |       |               |              |                   |                                              | <i>Dendryphon penicillatum</i> JN578618        | 93%(443/477)         | Spain                                                                                                                         |
| OTU 58 | 4     | 62    | Ascomycota    | Helotiales   | Unassigned        | <i>Tetracladium</i> sp. <sup>b</sup>         | Uncultured <i>Tetracladium</i> clone KC694156  | <b>98%(519/531)</b>  | Roots of <i>Triticum aestivum</i> in Sweden                                                                                   |
| OTU 59 | 2     | 3     | Ascomycota    | Unassigned   | Unassigned        | Ascomycota sp.                               | Uncultured ascomycete clone AM902002           | 86%(469/544)         | House dust in Finland                                                                                                         |
|        |       |       |               |              |                   |                                              | <i>Rhinocladiella</i> sp. EU139138             | 86% (469/543)        | Lichen ( <i>Umbilicaria vellea</i> ) in China (Hebei)                                                                         |
| OTU 60 | 4     | 97    | Ascomycota    | Pleosporales | Pleosporineae     | <i>Leptosphaeria</i> sp. <sup>b</sup>        | Uncultured <i>Leptosphaeria</i> clone EU852362 | <b>99%(516/519)</b>  | Plant ( <i>Fraxinus excelsior</i> ) in Sweden                                                                                 |
| OTU 61 | 2     | 11    | Basidiomycota | Pucciniales  | Melampsoraaceae   | <i>Melampsora epitea</i> <sup>a</sup>        | <i>Melampsora epitea</i> GQ479257              | <b>97%(221/228)</b>  | Willow in Canada (Nunavut, Keewatin District, Chesterfield Inlet)                                                             |
| OTU 62 | 1     | 8     | Basidiomycota | Unassigned   | Unassigned        | Basidiomycota sp.                            | Uncultured fungus clone KF274456               | 87%(375/431)         | <i>Picea abies</i> stumps in Finland                                                                                          |
|        |       |       |               |              |                   |                                              | Uncultured Basidiomycota clone GU328523        | 88%(355/405)         | Oe layer in a forested landscape                                                                                              |
| OTU 63 | 1     | 11    | Ascomycota    | Helotiales   | Dermateaceae      | <i>Helgardia</i> sp. <sup>b</sup>            | Uncultured ascomycete clone AM901839           | <b>99%(509/512)</b>  | House dust in Finland                                                                                                         |
|        |       |       |               |              |                   |                                              | <i>Helgardia</i> sp. HQ533816                  | <b>99%(459/462)</b>  | Antarctic lake                                                                                                                |
| OTU 64 | 4     | 13    | Basidiomycota | Tremellales  | Unassigned        | <i>Cryptococcus tephrensia</i> <sup>a</sup>  | <i>Cryptococcus tephrensia</i> DQ000318        | <b>98%(501/511)</b>  | Plant leaves                                                                                                                  |
| OTU 65 | 2     | 812   | Ascomycota    | Xylariales   | Amphisphaeriaceae | Amphisphaeriaceae sp.                        | Uncultured fungus clone KC966357               | <b>97%(400/413)</b>  | Arctic soil in Canada (73.22N; 119.56W)                                                                                       |
|        |       |       |               |              |                   |                                              | <i>Discosia pseudoartocreas</i> KF777161       | 90%(395/441)         | Plant leaves ( <i>Tilia</i> sp.) in Austria (Innsbruck)                                                                       |
| OTU 66 | 3     | 46    | Ascomycota    | Helotiales   | Unassigned        | <i>Cadophora luteo-olivacea</i> <sup>a</sup> | <i>Cadophora luteo-olivacea</i> HM116747       | <b>99%(530/534)</b>  | Plant ( <i>Vitis vinifera</i> ) in New Zealand                                                                                |
| OTU 67 | 3     | 14    | Basidiomycota | Tremellales  | Unassigned        | <i>Cryptococcus</i> sp. <sup>b</sup>         | Uncultured fungus clone KC966331               | <b>99%(481/486)</b>  | Arctic soil in Canada (78.78N; 103.55W)                                                                                       |
|        |       |       |               |              |                   |                                              | <i>Cryptococcus</i> sp. KC455886               | <b>99% (426/428)</b> | Snow with superficial sediment in Italy (Helbronner peak, Mont Blanc, Italian Alps)                                           |
| OTU 68 | 2     | 2     | Ascomycota    | Helotiales   | Unassigned        | Helotiales sp.                               | Ascomycota sp. FM207647                        | 91%(436/480)         | Surface sterilised roots of <i>Deschampsia antarctica</i> in Antarctica (South Orkney Islands, Shingle Cove) (60.39S, 45.33W) |
|        |       |       |               |              |                   |                                              | <i>Varicosporium delicatum</i> KF730848        | 94%(354/377)         | Unreported                                                                                                                    |

| OTU ID | Freq. | Reads | phylum        | Order         | Family            | Identification                               | Close GenBank match / Accession            | Similarity           | Originally reported habitat                                                                             |
|--------|-------|-------|---------------|---------------|-------------------|----------------------------------------------|--------------------------------------------|----------------------|---------------------------------------------------------------------------------------------------------|
| OTU 69 | 1     | 11    | Ascomycota    | Hypocreales   | Unassigned        | <i>Acremonium rutilum</i> <sup>a</sup>       | Uncultured fungus clone KC965330           | <b>99%(445/448)</b>  | Arctic soil in USA (70.31N; 147.99W)                                                                    |
|        |       |       |               |               |                   |                                              | <i>Acremonium rutilum</i> NR077124         | <b>97%(422/435)</b>  | Moist greenhouse wall in Germany                                                                        |
| OTU 70 | 1     | 17    | Ascomycota    | Unassigned    | Unassigned        | Ascomycota sp.                               | Uncultured fungus clone KF274173           | 91%(361/398)         | <i>Picea abies</i> stumps in Finland                                                                    |
|        |       |       |               |               |                   |                                              | Uncultured ascomycete clone AM901896       | 86%(362/422)         | House dust in Finland                                                                                   |
| OTU 71 | 1     | 5     | Ascomycota    | Unassigned    | Unassigned        | Ascomycota sp.                               | Pleosporales sp. HQ631002                  | 82%(356/432)         | Unreported                                                                                              |
| OTU 72 | 5     | 6     | Unassigned    | Unassigned    | Unassigned        | Fungus sp.                                   | Uncultured fungus clone KF742601           | <b>99%(345/347)</b>  | Imported asymptomatic live woody plant material (Prunus) in USA                                         |
| OTU 73 | 3     | 46    | Ascomycota    | Chaetothiales | Herpotrichiaceae  | <i>Rhinocladiella</i> sp. <sup>b</sup>       | Uncultured fungus clone KC965227           | <b>98%(558/570)</b>  | Arctic soil in Canada (76.23N; 119.30W)                                                                 |
|        |       |       |               |               |                   |                                              | <i>Rhinocladiella</i> sp. FJ948175         | <b>97%(507/521)</b>  | Rock-inhabiting fungus from Aketao (Xinjiang, China)                                                    |
| OTU 74 | 9     | 1048  | Ascomycota    | Pleosporales  | Unassigned        | Pleosporales sp.                             | Uncultured fungus clone GU817184           | <b>98%(504/513)</b>  | Root system ( <i>Bistorta vivipara</i> ) in Norway (Svalbard Midtre Lovenbreen ) (78.90555N; 12.08450E) |
|        |       |       |               |               |                   |                                              | Pleosporales sp. AB751503                  | <b>98% (483/493)</b> | <i>Salix arctica</i> leaf and stem litter on deglaciated moraines in high-arctic Canada                 |
| OTU 75 | 1     | 6     | Basidiomycota | Tremellales   | Unassigned        | Tremellales sp.                              | Uncultured Basidiomycota clone GU328576    | 91%(474/521)         | Oe layer in forest                                                                                      |
|        |       |       |               |               |                   |                                              | <i>Cryptococcus skinneri</i> NR073211      | 91% (439/485)        | Unreported                                                                                              |
| OTU 76 | 4     | 1076  | Ascomycota    | Pezizales     | Unassigned        | Pezizales sp.                                | Uncultured fungus clone KF296725           | <b>97%(475/490)</b>  | Arctic soil in Canada (76.23N; 119.30W)                                                                 |
|        |       |       |               |               |                   |                                              | <i>Phialea strobilina</i> EF596821         | 92% (302/327)        | Needle in Norway                                                                                        |
| OTU 77 | 1     | 252   | Ascomycota    | Helotiales    | Unassigned        | Helotiales sp.                               | Uncultured fungus clone KF274367           | <b>97%(485/498)</b>  | <i>Picea abies</i> stumps in Finland                                                                    |
|        |       |       |               |               |                   |                                              | Helotiales sp. HQ608110                    | <b>97%(466/482)</b>  | Trachymyrmex septentrionalis nest in USA (Stengl Biology Station, Texas)                                |
| OTU 78 | 2     | 77    | Ascomycota    | Pleosporales  | Leptosphaeriaceae | Leptosphaeriaceae sp.                        | Uncultured fungus clone KC965764           | 95%(449/473)         | Arctic soil in Canada (78.78N; 103.55)                                                                  |
|        |       |       |               |               |                   |                                              | <i>Leptosphaeria doliolum</i> JF740206     | 93%(357/384)         | Rudbeckia in Netherlands                                                                                |
| OTU 79 | 2     | 217   | Ascomycota    | Helotiales    | Unassigned        | Helotiales sp.                               | Uncultured <i>Cadophora</i> clone GQ219956 | 91%(415/456)         | Soil in Germany (Thuringia, Hainich)                                                                    |
| OTU 80 | 4     | 225   | Ascomycota    | Unassigned    | Unassigned        | <i>Eleutheromyces subulatus</i> <sup>a</sup> | <i>Eleutheromyces subulatus</i> KJ710471   | <b>99%(485/487)</b>  | Decaying host (Russulaceae) in Canada (Alberta)                                                         |

| OTU ID | Freq. | Reads | phylum        | Order             | Family            | Identification                                | Close GenBank match / Accession              | Similarity          | Originally reported habitat                                                                              |
|--------|-------|-------|---------------|-------------------|-------------------|-----------------------------------------------|----------------------------------------------|---------------------|----------------------------------------------------------------------------------------------------------|
| OTU 81 | 1     | 18    | Ascomycota    | Xylariales        | Amphisphaeriaceae | Amphisphaeriaceae sp.                         | Uncultured fungus clone KC966357             | 97%(388/398)        | Arctic soil in Canada (73.22N; 119.56W)                                                                  |
|        |       |       |               |                   |                   |                                               | <i>Discosia pseudoartocreas</i> KF777161     | 90%(384/426)        | Plant leaves ( <i>Tilia</i> sp.) in Austria (Innsbruck)                                                  |
| OTU 82 | 8     | 3433  | Ascomycota    | Pleosporales      | Phaeosphaeriaceae | <i>Mycopappus</i> sp. <sup>b</sup>            | Uncultured soil fungus clone DQ420833        | <b>98%(527/537)</b> | Soil in USA (Cedar Creek, Minnesota)                                                                     |
|        |       |       |               |                   |                   |                                               | <i>Mycopappus aceris</i> FJ839625            | 95%(504/533)        | Fallen leaves ( <i>Acer macrophyllum</i> ) in Canada                                                     |
| OTU 83 | 2     | 47    | Unassigned    | Unassigned        | Unassigned        | Fungus sp.                                    | Uncultured fungus clone KF800378             | 87%(426/492)        | House dust in USA (Missouri, Kansas City)                                                                |
| OTU 84 | 1     | 36    | Ascomycota    | Xylariales        | Amphisphaeriaceae | Amphisphaeriaceae sp.                         | Uncultured fungus clone KC966357             | <b>97%(410/413)</b> | Arctic soil in Canada (73.22N; 119.56W)                                                                  |
|        |       |       |               |                   |                   |                                               | <i>Discosia pseudoartocreas</i> KF777161     | 90%(397/441)        | Plant leaves ( <i>Tilia</i> sp.) in Austria (Innsbruck)                                                  |
| OTU 85 | 4     | 1826  | Ascomycota    | Xylariales        | Unassigned        | Xylariales sp.                                | <i>Leiosphaerella lycopodina</i> JF440975    | 90%(479/533)        | Unreported                                                                                               |
| OTU 86 | 3     | 297   | Basidiomycota | Pucciniales       | Melampsoraceae    | <i>Melampsora epitea</i> <sup>a</sup>         | <i>Melampsora epitea</i> GQ479257            | <b>98%(216/220)</b> | Willow in Canada (Nunavut, Keewatin District, Chesterfield Inlet)                                        |
| OTU 87 | 9     | 248   | Ascomycota    | Hypocreales       | Nectriaceae       | <i>Fusarium</i> sp.                           | Uncultured <i>Fusarium</i> sp. GQ280339      | <b>99%(535/536)</b> | Plant roots ( <i>Paphiopedilum armeniacum</i> ) in South Western China                                   |
| OTU 88 | 2     | 23    | Basidiomycota | Erythrobasidiales | Unassigned        | Erythrobasidiales sp.                         | Uncultured basidiomycete AM901803            | 95%(469/496)        | House dust in Finland                                                                                    |
|        |       |       |               |                   |                   |                                               | <i>Erythrobasidium hasegawianum</i> AB036065 | 94%(442/469)        | Plant in Japan                                                                                           |
| OTU 89 | 2     | 388   | Ascomycota    | Unassigned        | Unassigned        | Ascomycota sp.                                | <i>Scleraconidioma sphagnicola</i> NR121294  | 93%(215/230)        | Unreported                                                                                               |
| OTU 90 | 1     | 15    | Ascomycota    | Helotiales        | Unassigned        | Helotiales sp.                                | Uncultured fungus clone FM999599             | 95%(389/411)        | Forest soil in USA (Ohio)                                                                                |
|        |       |       |               |                   |                   |                                               | Uncultured Helotiales clone FJ475762         | 92%(393/426)        | <i>Pinus sylvestris</i> forest soil in Sweden                                                            |
| OTU 91 | 2     | 22    | Ascomycota    | Helotiales        | Unassigned        | Helotiales sp.                                | Uncultured fungus clone KF274394             | <b>99%(434/437)</b> | <i>Picea abies</i> stumps in Finland                                                                     |
|        |       |       |               |                   |                   |                                               | Helotiales sp. HQ845751                      | 92%(394/426)        | Surface sterilized needle tissue ( <i>Pinus monticola</i> ) in USA (Antler Ridge Property, Missoula, MT) |
| OTU 92 | 3     | 15    | Basidiomycota | Agaricostilbales  | Agaricostilbaceae | Agaricostilbaceae sp.                         | <i>Bensingtonia chanbaiensis</i> AY233339    | 93%(402/432)        | Unreported                                                                                               |
| OTU 93 | 4     | 1383  | Ascomycota    | Pleosporales      | Phaeosphaeriaceae | Phaeosphaeriaceae sp.                         | Fungal sp. KF527818                          | 96%(371/387)        | Plant ( <i>Carex bigelowii</i> ) root in Finland                                                         |
|        |       |       |               |                   |                   |                                               | <i>Mycopappus aceris</i> FJ839625            | 93%(362/390)        | Fallen leaves ( <i>Acer macrophyllum</i> ) in Canada                                                     |
| OTU 94 | 2     | 577   | Ascomycota    | Pleosporales      | Leptosphaeriaceae | <i>Leptosphaeria pedicularis</i> <sup>a</sup> | <i>Leptosphaeria pedicularis</i> JF740224    | <b>99%(331/336)</b> | Plant ( <i>Pedicularis</i> ) Switzerland                                                                 |

| OTU ID  | Freq. | Reads | phylum        | Order               | Family               | Identification                               | Close GenBank match / Accession             | Similarity           | Originally reported habitat                                                                             |
|---------|-------|-------|---------------|---------------------|----------------------|----------------------------------------------|---------------------------------------------|----------------------|---------------------------------------------------------------------------------------------------------|
| OTU 95  | 7     | 131   | Ascomycota    | Helotiales          | Helotiaceae          | Helotiaceae sp.                              | Uncultured fungus clone GU174277            | 95%(399/419)         | Forest floor ( <i>Acer saccharum</i> ) in USA (Michigan, Baraga State Forest area) (46.8634N; 88.8843W) |
|         |       |       |               |                     |                      |                                              | <i>Articulospora tetracladia</i> EU998929   | 92% (387/420)        | Aquatic sample                                                                                          |
| OTU 96  | 3     | 10    | Basidiomycota | Tremellales         | Tremellaceae         | <i>Dioszegia</i> sp. <sup>b</sup>            | <i>Dioszegia</i> sp. DQ402529               | <b>98%(409/416)</b>  | Soils of Taylor Valley, Antarctica                                                                      |
| OTU 97  | 1     | 160   | Ascomycota    | Chaetothyriales     | Herpotrichiellaceae  | Herpotrichiellaceae sp.                      | Uncultured fungus clone KC965841            | <b>98%(521/534)</b>  | Arctic soil in USA (69.67N; 148.72W)                                                                    |
|         |       |       |               |                     |                      |                                              | <i>Capronia</i> sp. EU139151                | 90%(454/506)         | Lichen Umbilicariales in USA (Appalachian Mts.)                                                         |
| OTU 98  | 2     | 3     | Ascomycota    | Capnodiales         | Teratosphaeriaceae   | Teratosphaeriaceae sp.                       | Uncultured fungus clone KF274301            | 87%(433/497)         | <i>Picea abies</i> stumps in Finland                                                                    |
|         |       |       |               |                     |                      |                                              | <i>Teratosphaeria encephalarti</i> FJ372400 | 91%(369/405)         | Living leaves ( <i>Encephalartos lebomboensis</i> ) in South Africa                                     |
| OTU 99  | 2     | 5     | Basidiomycota | Cystofilobasidiales | Cystofilobasidiaceae | <i>Cryptococcus niccomabsii</i> <sup>a</sup> | Uncultured Basidiomycota clone AM901720     | <b>99%(361/364)</b>  | House dust in Finland                                                                                   |
|         |       |       |               |                     |                      |                                              | <i>Cryptococcus niccomabsii</i> AY029346    | <b>99%(323/325)</b>  | Unreported                                                                                              |
| OTU 100 | 5     | 10    | Ascomycota    | Phacidiales         | Phacidiaceae         | Phacidiaceae sp.                             | Uncultured fungus clone JN032535            | 92%(490/533)         | Moss litter from coniferous forest                                                                      |
|         |       |       |               |                     |                      |                                              | <i>Allantophomopsis lycopodina</i> JX981469 | 91%(478/524)         | Above-ground tissue of <i>Lycopodium annotinum</i> in Poland                                            |
| OTU 101 | 1     | 8     | Ascomycota    | Lecanorales         | Porpidiaceae         | <i>Biatora</i> sp. <sup>b</sup>              | Uncultured fungus clone KC965546            | <b>98%(385/391)</b>  | Arctic soil in Canada (76.23N; 119.30W)                                                                 |
|         |       |       |               |                     |                      |                                              | <i>Biatora tetramera</i> AJ247561           | 95%(365/386)         | Finland (Karelia australis)                                                                             |
| OTU 102 | 1     | 39    | Ascomycota    | Unassigned          | Unassigned           | Ascomycota sp.                               | <i>Phaeothecoidea melaleuca</i> HQ599594    | 90%(508/567)         | On leaves of <i>Melaleuca quinquenervia</i> in Australia                                                |
| OTU 103 | 3     | 337   | Ascomycota    | Microascales        | Halosphaeriaceae     | <i>Monodictys arctica</i> <sup>a</sup>       | Uncultured fungus clone GU817175            | <b>99%(520/522)</b>  | Root systems of <i>Bistorta vivipara</i> in Norway: Svalbard Midtre Lovenbreen (78.90555N; 12.08450E)   |
|         |       |       |               |                     |                      |                                              | <i>Monodictys arctica</i> EU686521          | <b>98% (509/519)</b> | Roots of <i>Saxifraga oppositifolia</i> in Canadian High Arctic                                         |
| OTU 104 | 2     | 2     | Ascomycota    | Unassigned          | Unassigned           | Ascomycota sp.                               | Uncultured fungus clone KF297187            | <b>99%(391/395)</b>  | Arctic soil in Canada (76.23N; 119.30W)                                                                 |
|         |       |       |               |                     |                      |                                              | <i>Sarea difformis</i> FJ903295             | 88%(346/394)         | <i>Picea abies</i> stands of Latvia                                                                     |
| OTU 105 | 4     | 403   | Ascomycota    | Capnodiales         | Teratosphaeriaceae   | Teratosphaeriaceae sp.                       | Uncultured ascomycete clone EU490102        | 92%(317/343)         | Savanna soil under grasses in USA (33.85 N; 99.45 W)                                                    |
|         |       |       |               |                     |                      |                                              | <i>Teratosphaeria allistairii</i> JX556227  | 92% (315/342)        | Leaves ( <i>Protea repens</i> ) in South Africa (Hermanus)                                              |
| OTU 106 | 1     | 3     | Ascomycota    | Hypocreales         | Nectriaceae          | Nectriaceae sp.                              | Uncultured fungus clone GU721600            | 87%(419/479)         | Surface dust in USA                                                                                     |
|         |       |       |               |                     |                      |                                              | <i>Nectria berolinensis</i> HM534893        | 90% (382/426)        | Plant <i>Ribes sanguineum</i>                                                                           |



| OTU ID  | Freq. | Reads | phylum        | Order               | Family               | Identification                           | Close GenBank match / Accession           | Similarity           | Originally reported habitat                                                                                  |
|---------|-------|-------|---------------|---------------------|----------------------|------------------------------------------|-------------------------------------------|----------------------|--------------------------------------------------------------------------------------------------------------|
| OTU 107 | 1     | 14    | Unassigned    | Unassigned          | Unassigned           | Fungus sp.                               | Uncultured fungus clone KF296943          | 88%(345/394)         | Arctic soil in Canada (76.23N; 119.30W)                                                                      |
| OTU 108 | 1     | 3     | Ascomycota    | Unassigned          | Unassigned           | <i>Xenopolyscytalum</i> sp. <sup>b</sup> | Uncultured Leotiomycetes clone HM230882   | <b>98%(438/449)</b>  | Cavendishoid mycorrhiza of <i>Cavendishia bracteata</i> in Ecuador                                           |
|         |       |       |               |                     |                      |                                          | <i>Xenopolyscytalum pinea</i> HQ599581    | 95% (425/449)        | Needles of <i>Pinus</i> sp. In Netherlands                                                                   |
| OTU 109 | 2     | 4     | Ascomycota    | Capnodiales         | Mycosphaerellaceae   | Mycosphaerellaceae sp.                   | Uncultured fungus clone KC965961          | 96%(474/493)         | Arctic soil in Canada (73.22N; 119.56W)                                                                      |
|         |       |       |               |                     |                      |                                          | <i>Xenostigmata zilleri</i> FJ839639      | 90% (419/468)        | Fallen leaves in Canada                                                                                      |
| OTU 110 | 2     | 93    | Ascomycota    | Capnodiales         | Cladosporiaceae      | <i>Cladosporium</i> sp. <sup>b</sup>     | Uncultured fungus clone KC965568          | <b>99%(519/520)</b>  | Arctic soil in Canada (73.22N; 119.56W)                                                                      |
|         |       |       |               |                     |                      |                                          | <i>Cladosporium</i> sp. EU167586          | <b>97% (529/543)</b> | Leaf of <i>Trifolium</i>                                                                                     |
| OTU 111 | 7     | 1060  | Ascomycota    | Pleosporales        | Phaeosphaeriaceae    | <i>Mycopappus</i> sp. <sup>b</sup>       | Uncultured fungus clone KF296865          | <b>99%(500/505)</b>  | Arctic soil in Canada (73.22N; 119.56W)                                                                      |
|         |       |       |               |                     |                      |                                          | <i>Mycopappus aceris</i> FJ839625         | 95% (507/532)        | Fallen leaves ( <i>Acer macrophyllum</i> ) in Canada                                                         |
| OTU 112 | 6     | 184   | Ascomycota    | Helotiales          | Unassigned           | Helotiales sp.                           | Uncultured Helotiales isolate GU931728    | 95%(345/365)         | House dust in Canada (45.2556N; 75.9204W)                                                                    |
| OTU 113 | 1     | 5     | Ascomycota    | Unassigned          | Unassigned           | Ascomycota sp.                           | Uncultured fungus clone KC965228          | <b>98%(368/376)</b>  | Arctic soil in Canada (76.23N; 119.30W)                                                                      |
|         |       |       |               |                     |                      |                                          | <i>Umbilicaria decussata</i> AF096214     | 88% (397/449)        | Unreported                                                                                                   |
| OTU 114 | 1     | 3     | Unassigned    | Unassigned          | Unassigned           | Fungus sp.                               | Uncultured fungus clone JN904716          | 90%(204/226)         | Phyllosphere of <i>Fagus sylvatica</i> in France                                                             |
| OTU 115 | 1     | 5     | Ascomycota    | Unassigned          | Unassigned           | Dothideomycetes sp.                      | Dothideomycetes sp. JQ759518              | <b>99% (287/290)</b> | Surface sterilized photosynthetic tissue of Plant ( <i>Cassiope tetragona</i> ) in USA (64.5011N; 165.4064W) |
| OTU 116 | 8     | 146   | Basidiomycota | Cystofilobasidiales | Cystofilobasidiaceae | <i>Mrakia</i> sp. <sup>b</sup>           | Uncultured <i>Mrakia</i> isolate GU931743 | <b>98%(313/321)</b>  | House dust in Canada (45.2556N; 75.9204W)                                                                    |
| OTU 117 | 1     | 9     | Ascomycota    | Helotiales          | Unassigned           | Helotiales sp.                           | <i>Pezizella discreta</i> JF908571        | 94%(475/508)         | Italy                                                                                                        |
| OTU 118 | 1     | 5     | Ascomycota    | Pleosporales        | Leptosphaeriaceae    | <i>Phoma sclerotioides</i> <sup>a</sup>  | <i>Phoma sclerotioides</i> EU265670       | <b>99%(473/478)</b>  | Plant ( <i>Medicago sativa</i> ) root in USA (New Mexico)                                                    |
| OTU 119 | 2     | 231   | Ascomycota    | Helotiales          | Vibrissaceae         | Vibrissaceae sp.                         | Uncultured Vibrissaceae clone FR773173    | 92%(338/367)         | Plant <i>Rhododendron ferrugineum</i>                                                                        |
| OTU 120 | 10    | 469   | Ascomycota    | Pleosporales        | Unassigned           | Pleosporales sp.                         | Uncultured fungus clone GU817159          | <b>98%(421/430)</b>  | Plant root ( <i>Bistorta vivipara</i> ) in Norway: Svalbard Midtre Lovenbreen (78.90555N; 12.08450E)         |
|         |       |       |               |                     |                      |                                          | Pleosporales sp. AB751503                 | 94% (420/445)        | Plant ( <i>Salix arctica</i> ) leaf and stem litter in high-arctic Canada                                    |
| OTU 121 | 1     | 4     | Unassigned    | Unassigned          | Unassigned           | Fungus sp.                               | Uncultured fungus clone KF800411          | 84%(335/398)         | House dust in USA (Missouri, Kansas City)                                                                    |

| OTU ID  | Freq. | Reads | phylum        | Order       | Family         | Identification                             | Close GenBank match / Accession               | Similarity          | Originally reported habitat                                                                             |
|---------|-------|-------|---------------|-------------|----------------|--------------------------------------------|-----------------------------------------------|---------------------|---------------------------------------------------------------------------------------------------------|
| OTU 122 | 2     | 566   | Ascomycota    | Hypocreales | Unassigned     | Hypocreales sp.                            | Uncultured fungus clone GU817178              | 96%(512/536)        | Plant root ( <i>Bistorta vivipara</i> ) in Norway: Svalbard Midtre Lovenbreen (78.90555N; 12.08450E)    |
|         |       |       |               |             |                |                                            | Uncultured Hypocreales clone FJ554224         | 88% (471/536)       | Forest soil in from the long-term soil productivity site Skulow Lake                                    |
| OTU 123 | 5     | 143   | Ascomycota    | Unassigned  | Unassigned     | <i>Articulospora</i> sp. <sup>b</sup>      | Uncultured fungus clone GU174277              | <b>97%(501/518)</b> | Forest floor ( <i>Acer saccharum</i> ) in USA (Michigan, Baraga State Forest area) (46.8634N; 88.8843W) |
|         |       |       |               |             |                |                                            | <i>Articulospora tetracladia</i> EU998918     | 96% (496/519)       | Aquatic sample                                                                                          |
| OTU 124 | 1     | 85    | Ascomycota    | Unassigned  | Unassigned     | Ascomycota sp.                             | Uncultured fungus clone FN610978              | 89%(425/480)        | Sandy clayey soil from a Fagus sylvatica forest stand                                                   |
|         |       |       |               |             |                |                                            | <i>Tothia fuscella</i> JF927786               | 86%(418/487)        | Plant ( <i>Teucrium chamaedrys</i> )                                                                    |
| OTU 125 | 7     | 161   | Basidiomycota | Tremellales | Unassigned     | <i>Cryptococcus</i> sp. <sup>b</sup>       | Uncultured <i>Cryptococcus</i> clone KC753413 | <b>97%(360/373)</b> | Plant stem ( <i>Triticum aestivum</i> ) in Sweden                                                       |
| OTU 126 | 2     | 2     | Ascomycota    | Venturiales | Venturiaceae   | Venturiaceae sp.                           | <i>Tothia fuscella</i> JF927786               | 93%(457/494)        | Unreported                                                                                              |
| OTU 127 | 2     | 11    | Ascomycota    | Venturiales | Unassigned     | Ascomycota sp.                             | Uncultured fungus clone AM260882              | 89%(310/350)        | Peat in United Kingdom (57.36N; 2.90W)                                                                  |
|         |       |       |               |             |                |                                            | <i>Venturia tremulae</i> EU035475             | 88%(304/347)        | Plant ( <i>Populus tremula</i> ) in Italy                                                               |
| OTU 128 | 7     | 705   | Ascomycota    | Capnodiales | Unassigned     | Capnodiales sp.                            | Uncultured fungus clone JQ247386              | 95%(483/523)        | Soil from transition shrubland (32.41N; 116.68W)                                                        |
|         |       |       |               |             |                |                                            | <i>Penidiella ellipsoidea</i> JF499843        | 92%(483/523)        | Leaf bracts ( <i>Phaenocoma prolifera</i> ) in South Africa                                             |
| OTU 129 | 3     | 27    | Basidiomycota | Tremellales | Unassigned     | <i>Cryptococcus victoriae</i> <sup>a</sup> | <i>Cryptococcus victoriae</i> JX188144        | <b>99%(331/334)</b> | Plant ( <i>Vitis vinifera</i> ) in USA (Central Washington State)                                       |
| OTU 130 | 1     | 9     | Basidiomycota | Tremellales | Unassigned     | Tremellales sp.                            | Uncultured fungus clone KC965860              | <b>98%(468/479)</b> | Arctic soil in Canada (76.23N; 119.30W)                                                                 |
|         |       |       |               |             |                |                                            | <i>Cryptococcus dimennae</i> HG008764         | 86%(381/444)        | Air sample in France (Montignac, Lascaux Cave)                                                          |
| OTU 131 | 2     | 276   | Ascomycota    | Venturiales | Venturiaceae   | <i>Venturia</i> sp. <sup>b</sup>           | <i>Venturia minuta</i> EU035464               | 96%(365/379)        | Plant ( <i>Salix nigricans</i> ) in Switzerland                                                         |
| OTU 132 | 3     | 102   | Basidiomycota | Pucciniales | Melampsoraceae | <i>Melampsora epitea</i> <sup>a</sup>      | <i>Melampsora epitea</i> GQ479257             | <b>98%(228/233)</b> | Willow in Canada (Nunavut, Keewatin District, Chesterfield Inlet)                                       |
| OTU 133 | 1     | 44    | Basidiomycota | Sebacinales | Sebacinaceae   | Sebacinaceae sp.                           | Uncultured fungus clone KF296861              | <b>99%(493/498)</b> | Arctic soil in Canada (76.23N; 119.30W)                                                                 |
|         |       |       |               |             |                |                                            | Uncultured <i>Sebacina</i> clone JQ420971     | 92% (475/517)       | Plant species <i>Vaccinium myrtillus</i>                                                                |
| OTU 134 | 3     | 1213  | Ascomycota    | Unassigned  | Unassigned     | Dothideomycetes sp.                        | Uncultured fungus clone KF800576              | 90%(510/569)        | Indoor air in USA (Missouri, Kansas City)                                                               |

| OTU ID  | Freq. | Reads | phylum        | Order               | Family               | Identification                          | Close GenBank match / Accession             | Similarity           | Originally reported habitat                                                                                  |
|---------|-------|-------|---------------|---------------------|----------------------|-----------------------------------------|---------------------------------------------|----------------------|--------------------------------------------------------------------------------------------------------------|
|         |       |       |               |                     |                      |                                         | Dothideomycetes sp. JQ759619                | 92% (456/498)        | Surface sterilized photosynthetic tissue of Plant ( <i>Cassiope tetragona</i> ) in USA (64.5011N; 165.4064W) |
| OTU 135 | 1     | 11    | Basidiomycota | Tremellales         | Unassigned           | Tremellales sp.                         | Uncultured Basidiomycota clone GU328576     | 95%(268/281)         | Oe layer in forest                                                                                           |
|         |       |       |               |                     |                      |                                         | <i>Cryptococcus</i> sp. HQ890370            | 94% (239/255)        | Plant leaves in China                                                                                        |
| OTU 136 | 1     | 6     | Ascomycota    | Saccharomycetales   | Metschnikowiaceae    | <i>Metschnikowia</i> sp. <sup>b</sup>   | <i>Metschnikowia bicuspidata</i> EF643581   | 95%(377/398)         | Unreported                                                                                                   |
| OTU 137 | 9     | 1250  | Basidiomycota | Cystofilobasidiales | Cystofilobasidiaceae | <i>Mrakia</i> sp. <sup>b</sup>          | Uncultured <i>Mrakia</i> isolate GU931743   | <b>99%(483/490)</b>  | House dust in Canada (45.2556N; 75.9204W)                                                                    |
| OTU 138 | 3     | 139   | Basidiomycota | Pucciniales         | Melampsoraceae       | <i>Melampsora epitea</i> <sup>a</sup>   | <i>Melampsora epitea</i> GQ479257           | <b>100%(201/201)</b> | Willow in Canada (Nunavut, Keewatin District, Chesterfield Inlet)                                            |
| OTU 139 | 2     | 69    | Ascomycota    | Venturiales         | Venturiaceae         | <i>Venturia atriseda</i> <sup>a</sup>   | <i>Venturia atriseda</i> EU035449           | <b>98%(556/565)</b>  | Plant ( <i>Gentiana lutea</i> ) in Switzerland                                                               |
| OTU 140 | 1     | 7     | Ascomycota    | Unassigned          | Unassigned           | Pezizomycotina sp.                      | Uncultured fungus clone KF274441            | 92%(239/261)         | Wood stump ( <i>Picea abies</i> ) in Finland                                                                 |
|         |       |       |               |                     |                      |                                         | Uncultured Pezizomycotina clone FJ553309    | 89% (232/260)        | Forest soil from the long-term soil productivity site Skulow Lake in Canada                                  |
| OTU 141 | 5     | 24    | Ascomycota    | Thelebolales        | Thelebolaceae        | Thelebolaceae sp.                       | Uncultured Thelebolaceae clone FM178231     | <b>99%(540/543)</b>  | Malthouse waster water                                                                                       |
| OTU 142 | 5     | 636   | Unassigned    | Unassigned          | Unassigned           | <i>Phaeosphaeria</i> sp. <sup>b</sup>   | Uncultured ascomycete clone AM901822        | 96%(421/439)         | House dust in Finland                                                                                        |
|         |       |       |               |                     |                      |                                         | <i>Phaeosphaeria triglochicola</i> AF439507 | 96% (364/379)        | Plant ( <i>Triglochin palustris</i> ) in Switzerland                                                         |
| OTU 143 | 1     | 3     | Ascomycota    | Unassigned          | Unassigned           | Pezizomycotina sp.                      | Uncultured fungus clone KF274441            | 94%(459/487)         | Wood stump ( <i>Picea abies</i> ) in Finland                                                                 |
|         |       |       |               |                     |                      |                                         | Uncultured Pezizomycotina clone FJ553309    | 89% (466/523)        | Forest soil from the long-term soil productivity site Skulow Lake                                            |
| OTU 144 | 1     | 24    | Unassigned    | Unassigned          | Unassigned           | Fungus sp.                              | Uncultured fungus clone EF521234            | 89%(283/319)         | Mesh bags buried in a phosphorus-poor spruce forest                                                          |
| OTU 145 | 1     | 306   | Ascomycota    | Unassigned          | Unassigned           | <i>Scleroconidioma</i> sp. <sup>b</sup> | <i>Scleroconidioma sphagnicola</i> NR121294 | 95%(541/569)         | Unreported                                                                                                   |
| OTU 146 | 4     | 9     | Ascomycota    | Capnodiales         | Teratosphaeriaceae   | Teratosphaeriaceae sp.                  | Uncultured fungus clone KF297284            | <b>99%(502/509)</b>  | Arctic soil in Canada (Banks Island) (73.22N; 119.56W)                                                       |
|         |       |       |               |                     |                      |                                         | Uncultured <i>Devriesia</i> clone JF519086  | 90% (459/511)        | <i>Fagus sylvatica</i> lateral root in Austria (Klausenleopoldsdorf)                                         |
| OTU 147 | 2     | 38    | Ascomycota    | Xylariales          | Xylariaceae          | Xylariaceae sp.                         | Uncultured Xylariaceae isolate EU326164     | <b>98%(429/437)</b>  | Ectomycorrhizal root tip of <i>Salix herbacea</i> on a glacier forefront in the Austrian Alps                |

| OTU ID  | Freq. | Reads | phylum        | Order           | Family              | Identification                                    | Close GenBank match / Accession               | Similarity          | Originally reported habitat                                                                               |
|---------|-------|-------|---------------|-----------------|---------------------|---------------------------------------------------|-----------------------------------------------|---------------------|-----------------------------------------------------------------------------------------------------------|
| OTU 148 | 2     | 5     | Ascomycota    | Capnodiales     | Unassigned          | <i>Elasticomyces elasticus</i> <sup>a</sup>       | <i>Elasticomyces elasticus</i> FJ415476       | <b>98%(448/457)</b> | Lichen in Antarctica                                                                                      |
| OTU 149 | 3     | 28    | Basidiomycota | Tremellales     | Unassigned          | <i>Dioszegia fristingensis</i> <sup>a</sup>       | <i>Dioszegia fristingensis</i> JQ768931       | <b>99%(479/480)</b> | Glacier surface snow in China (Tibet plateau)                                                             |
| OTU 150 | 2     | 20    | Ascomycota    | Capnodiales     | Cladosporiaceae     | <i>Rachicladosporium monterosium</i> <sup>a</sup> | Uncultured fungus clone KC966347              | <b>97%(495/511)</b> | Arctic soil in Canada (76.23N; 119.30W)                                                                   |
|         |       |       |               |                 |                     |                                                   | <i>Rachicladosporium monterosium</i> KF309940 | <b>98%(464/472)</b> | Unreported                                                                                                |
| OTU 151 | 4     | 10    | Ascomycota    | Microascales    | Halosphaeriaceae    | <i>Monodictys</i> sp. <sup>b</sup>                | <i>Monodictys arctica</i> EU686521            | 96%(419/435)        | Roots of <i>Saxifraga oppositifolia</i> in Canadian High Arctic                                           |
| OTU 152 | 1     | 30    | Ascomycota    | Helotiales      | Unassigned          | Helotiales sp.                                    | Uncultured fungus clone KC965667              | <b>98%(461/470)</b> | Arctic soil in USA (69.15N; 148.85W)                                                                      |
|         |       |       |               |                 |                     |                                                   | Uncultured Helotiales clone FJ827194          | 96%(326/341)        | Ectomycorrhiza of <i>Potentilla</i> sp. on an alpine-meadow in southwestern China                         |
| OTU 153 | 1     | 5     | Ascomycota    | Chaetothyriales | Trichomeriaceae     | Trichomeriaceae sp.                               | Uncultured soil fungus clone DQ421063         | <b>99%(559/568)</b> | Soil in USA (Cedar Creek, Minnesota)                                                                      |
|         |       |       |               |                 |                     |                                                   | <i>Knufia petricola</i> KC978734              | 94%(549/582)        | Unreported                                                                                                |
| OTU 154 | 1     | 12    | Ascomycota    | Helotiales      | Unassigned          | Helotiales sp.                                    | Uncultured fungus clone KF742558              | <b>97%(349/358)</b> | Imported asymptomatic live woody plant material ( <i>Acer</i> ) in USA                                    |
|         |       |       |               |                 |                     |                                                   | Uncultured Helotiales clone KF498574          | 87%(415/478)        | Extracted from fine roots ( <i>Fagus sylvatica</i> ) in Germany (Beech forest near Tuttlingen, Swabian)   |
| OTU 155 | 2     | 14    | Basidiomycota | Unassigned      | Unassigned          | Basidiomycota sp.                                 | Uncultured basidiomycete AM901997             | <b>98%(367/375)</b> | House dust in Finland                                                                                     |
| OTU 156 | 1     | 7     | Ascomycota    | Helotiales      | Unassigned          | <i>Varicosporium elodeae</i> <sup>a</sup>         | Uncultured fungus clone KF617967              | 90%(346/386)        | <i>Picea mariana</i> forest soil organic horizon in USA (Alaska, Bonaza Creek LTER) (63.9062N; 145.3712W) |
|         |       |       |               |                 |                     |                                                   | <i>Varicosporium elodeae</i> JN995640         | <b>97%(257/264)</b> | Svalbard                                                                                                  |
| OTU 157 | 3     | 2383  | Ascomycota    | Hypocreales     | Unassigned          | Hypocreales sp.                                   | Uncultured fungus clone GU817178              | 95%(406/427)        | Root system of <i>Bistorta vivipara</i> in Norway (Svalbard Midtre Lovenbreen) (78.90N; 12.08E)           |
|         |       |       |               |                 |                     |                                                   | <i>Myrothecium</i> sp. KF723006               | 90%(381/423)        | Aerated municipal sewage sludge in India (Koyambedu, Chennai)                                             |
| OTU 158 | 1     | 3     | Ascomycota    | Chaetothyriales | Herpotrichiellaceae | Herpotrichiellaceae sp.                           | Uncultured ascomycete clone AM901730          | 91%(386/424)        | House dust in Finland                                                                                     |
|         |       |       |               |                 |                     |                                                   | <i>Coniosporium</i> sp. AJ971446              | 90%(381/423)        | Marble monument in Turkey (Mediterranean)                                                                 |

| OTU ID  | Freq. | Reads | phylum          | Order        | Family             | Identification                        | Close GenBank match / Accession               | Similarity          | Originally reported habitat                                                                                         |
|---------|-------|-------|-----------------|--------------|--------------------|---------------------------------------|-----------------------------------------------|---------------------|---------------------------------------------------------------------------------------------------------------------|
| OTU 159 | 6     | 471   | Ascomycota      | Capnodiales  | Mycosphaerellaceae | Mycosphaerellaceae sp.                | Uncultured soil fungus clone DQ420833         | <b>97%(514/530)</b> | Soil in USA (Cedar Creek, Minnesota)                                                                                |
|         |       |       |                 |              |                    |                                       | <i>Xenostigmata zilleri</i> FJ839639          | 94%(503/535)        | Fallen leaves of <i>Acer macrophyllum</i> in Canada                                                                 |
| OTU 160 | 1     | 12    | Ascomycota      | Helotiales   | Helotiaceae        | Helotiaceae sp.                       | <i>Gremmeniella laricina</i> U72262           | 94%(343/363)        | From <i>Larix decidua</i> in Switzerland                                                                            |
| OTU 161 | 2     | 25    | Basidiomycota   | Pucciniales  | Melampsoraceae     | <i>Melampsora</i> sp. <sup>b</sup>    | Uncultured <i>Melampsora</i> clone JN646138   | 95%(328/344)        | Small discs of infected leaf material of <i>Saxifraga arbuscula</i> in United Kingdom (Scotland, Beinn Heasgarnich) |
| OTU 162 | 2     | 12    | Ascomycota      | Unassigned   | Unassigned         | Ascomycota sp.                        | Uncultured fungus clone KF274173              | 89%(446/500)        | <i>Picea abies</i> stumps in Finland                                                                                |
|         |       |       |                 |              |                    |                                       | Uncultured Helotiales clone FJ827194          | 85%(382/448)        | Ectomycorrhiza of <i>Potentilla</i> sp. on an alpine-meadow in southwestern China                                   |
| OTU 163 | 2     | 115   | Ascomycota      | Unassigned   | Unassigned         | Ascomycota sp.                        | Uncultured fungus clone KF296725              | <b>99%(485/491)</b> | Arctic soil in Canada (76.23N; 119.30W)                                                                             |
|         |       |       |                 |              |                    |                                       | <i>Hyaloscypha</i> sp. GU393951               | 84%(443/527)        | Scots pine needles ( <i>Pinus sylvestris</i> ) in Sweden                                                            |
| OTU 164 | 5     | 225   | Ascomycota      | Helotiales   | Unassigned         | Helotiales sp.                        | <i>Leptodontidium orchidicola</i> KF646097    | 94%(461/490)        | Plant root of <i>Rosa rugosa</i> in Lithuania                                                                       |
| OTU 165 | 1     | 19    | Ascomycota      | Unassigned   | Unassigned         | Fungus sp.                            | Uncultured fungus clone KC966118              | <b>99%(510/512)</b> | Arctic soil in USA (69.67N;148.72W)                                                                                 |
| OTU 166 | 7     | 1696  | Ascomycota      | Helotiales   | Helotiaceae        | <i>Articulospora</i> sp. <sup>b</sup> | Uncultured fungus clone KC966259              | <b>99%(482/489)</b> | Arctic soil in Canada (76.23N;119.30W)                                                                              |
|         |       |       |                 |              |                    |                                       | <i>Articulospora tetracladia</i> EU998918     | 96%(482/504)        | Aquatic sample                                                                                                      |
| OTU 167 | 1     | 7     | Basidiomycota   | Naohideales  | Unassigned         | Naohideales sp.                       | <i>Naohidea sebaceae</i> NR121324             | 89%(429/482)        | Taiwan                                                                                                              |
| OTU 168 | 7     | 189   | Ascomycota      | Pleosporales | Melanommataceae    | Melanommataceae sp.                   | Fungal sp. KF527818                           | 95%(444/467)        | Plant ( <i>Carex bigelowii</i> ) root in Finland                                                                    |
|         |       |       |                 |              |                    |                                       | <i>Herpotrichia juniperi</i> JX981496         | 94%(405/430)        | Plant in Poland                                                                                                     |
| OTU 169 | 1     | 276   | Chytridiomycota | Chytridiales | Unassigned         | Chytridiales sp.                      | <i>Synchytrium cupulatum</i> KF160867         | 89%(221/247)        | Plant ( <i>Dryas octopetala</i> ) in Finland                                                                        |
| OTU 170 | 3     | 53    | Ascomycota      | Capnodiales  | Unassigned         | <i>Penidiella</i> sp. <sup>b</sup>    | <i>Penidiella ellipsoidea</i> JF499843        | 95%(455/480)        | Leaf bracts ( <i>Phaenocoma prolifera</i> ) in South Africa                                                         |
| OTU 171 | 3     | 99    | Ascomycota      | Helotiales   | Helotiaceae        | Helotiaceae sp.                       | <i>Claussenomyces</i> sp. HQ533008            | 94%(472/503)        | New Zealand                                                                                                         |
| OTU 172 | 1     | 587   | Ascomycota      | Helotiales   | Unassigned         | <i>Tetracladium</i> sp. <sup>b</sup>  | Uncultured <i>Tetracladium</i> clone KC694156 | 95%(510/539)        | Roots of <i>Triticum aestivum</i> in Sweden                                                                         |
| OTU 173 | 3     | 6     | Ascomycota      | Helotiales   | Leotiaceae         | <i>Alatospora</i> sp. <sup>b</sup>    | Uncultured <i>Alatospora</i> clone JF519259   | 96%(381/398)        | <i>Fagus sylvatica</i> lateral root in Austria (48.11N; 16.05E)                                                     |
| OTU 174 | 7     | 391   | Unassigned      | Unassigned   | Unassigned         | Fungus sp.                            | Uncultured fungus clone KF742601              | 95%(466/488)        | Imported asymptomatic live woody plant material ( <i>Prunus</i> ) in USA                                            |

| OTU ID  | Freq. | Reads | phylum        | Order        | Family            | Identification                                | Close GenBank match / Accession               | Similarity          | Originally reported habitat                                                                                               |
|---------|-------|-------|---------------|--------------|-------------------|-----------------------------------------------|-----------------------------------------------|---------------------|---------------------------------------------------------------------------------------------------------------------------|
| OTU 175 | 3     | 10    | Ascomycota    | Helotiales   | Unassigned        | Helotiales sp.                                | Uncultured Helotiales clone FJ827183          | 91%(487/536)        | Ectomycorrhiza of <i>Potentilla</i> sp. on alpine-meadow in southwestern China                                            |
| OTU 176 | 3     | 347   | Ascomycota    | Venturiales  | Venturiaceae      | <i>Venturia minuta</i> <sup>a</sup>           | <i>Venturia minuta</i> EU035464               | <b>97%(541/556)</b> | Plant ( <i>Salix nigricans</i> ) in Switzerland                                                                           |
| OTU 177 | 1     | 5     | Ascomycota    | Microascales | Halosphaeriaceae  | <i>Monodictys</i> sp. <sup>b</sup>            | Uncultured fungus clone GU817175              | 96%(449/468)        | Root systems of <i>Bistorta vivipara</i> in Norway (Svalbard Midtre Lovenbreen) (78.90N; 12.08E)                          |
|         |       |       |               |              |                   |                                               | <i>Monodictys arctica</i> EU686521            | 96%(448/467)        | Roots of <i>Saxifraga oppositifolia</i> in Canadian High Arctic                                                           |
| OTU 178 | 1     | 23    | Basidiomycota | Unassigned   | Unassigned        | Basidiomycota sp.                             | Uncultured fungus clone EF521234              | 91%(419/462)        | Mesh bags in a phosphorus-poor spruce forest                                                                              |
|         |       |       |               |              |                   |                                               | Basidiomycete sp. AM084802                    | 89%(351/396)        | Boreal forests in Norway                                                                                                  |
| OTU 179 | 5     | 706   | Ascomycota    | Helotiales   | Unassigned        | <i>Tetracladium</i> sp. <sup>b</sup>          | Uncultured soil fungus clone JQ666656         | <b>98%(519/532)</b> | Forest soil in northern temperate forest (China, Changbai Mountain)                                                       |
|         |       |       |               |              |                   |                                               | <i>Tetracladium furcatum</i> EU883432         | 96%(513/533)        | Auqtic sample                                                                                                             |
| OTU 180 | 3     | 221   | Ascomycota    | Unassigned   | Unassigned        | Ascomycota sp.                                | Uncultured fungus clone KC966025              | 95%(365/384)        | Arctic soil in Canada (76.23N; 119.30W)                                                                                   |
|         |       |       |               |              |                   |                                               | <i>Pseudeuratum bakeri</i> GU934582           | 86%(491/547)        | Root systems from mixed <i>Fraxinus excelsior</i> stands with rich soils and badly damaged by fungal attacks in Lithuania |
| OTU 181 | 4     | 24    | Ascomycota    | Xylariales   | Amphisphaeriaceae | Amphisphaeriaceae sp.                         | Uncultured fungus clone KC965587              | 98%(483/495)        | Arctic soil in Canada (73.22N; 119.56W)                                                                                   |
|         |       |       |               |              |                   |                                               | <i>Seimatosporium walkeri</i> JN871207        | 94% (490/523)       | Plant ( <i>Eucalyptus</i> sp.) in Australia                                                                               |
| OTU 182 | 6     | 1066  | Ascomycota    | Helotiales   | Unassigned        | <i>Tetracladium</i> sp. <sup>b</sup>          | Uncultured <i>Tetracladium</i> clone KC753432 | <b>97%(515/530)</b> | Roots of <i>Triticum aestivum</i> in Sweden                                                                               |
| OTU 183 | 2     | 496   | Ascomycota    | Pleosporales | Leptosphaeriaceae | <i>Leptosphaeria pedicularis</i> <sup>a</sup> | <i>Leptosphaeria pedicularis</i> JF740224     | <b>98%(456/463)</b> | Pedicularis in Switzerland                                                                                                |
| OTU 184 | 1     | 65    | Ascomycota    | Capnodiales  | Unassigned        | Capnodiales sp.                               | Uncultured Capnodiales clone KF922740         | 90%(454/504)        | Apple surface in USA (Iowa)                                                                                               |
| OTU 185 | 4     | 1196  | Ascomycota    | Xylariales   | Amphisphaeriaceae | Amphisphaeriaceae sp.                         | <i>Leiosphaerella lycopodina</i> JF440975     | 91%(375/410)        | Unreported                                                                                                                |
| OTU 186 | 9     | 2394  | Basidiomycota | Tremellales  | Unassigned        | <i>Cryptococcus</i> sp. <sup>b</sup>          | Uncultured basidiomycete clone AM901845       | <b>97%(359/369)</b> | House dust in Finland                                                                                                     |
|         |       |       |               |              |                   |                                               | Uncultured <i>Cryptococcus</i> clone JF495244 | <b>97%(359/370)</b> | Beech litter in Austria (Lower Austria, Klausenleopoldsdorf)                                                              |
| OTU 187 | 4     | 314   | Ascomycota    | Capnodiales  | Unassigned        | Capnodiales sp.                               | Uncultured fungus clone KC965669              | <b>99%(497/504)</b> | Arctic soil in USA (69.15N; 148.85W)                                                                                      |
|         |       |       |               |              |                   |                                               | <i>Penidiella ellipsoidea</i> JF499843        | 91%(455/500)        | Leaf bracts ( <i>Phaenocoma prolifera</i> ) in South Africa                                                               |

| OTU ID  | Freq. | Reads | phylum        | Order         | Family             | Identification                            | Close GenBank match / Accession               | Similarity    | Originally reported habitat                                                                    |
|---------|-------|-------|---------------|---------------|--------------------|-------------------------------------------|-----------------------------------------------|---------------|------------------------------------------------------------------------------------------------|
| OTU 188 | 1     | 2     | Ascomycota    | Helotiales    | Sclerotiniaceae    | <i>Sclerotinia</i> sp. <sup>b</sup>       | <i>Sclerotinia</i> sp. AJ279480               | 99%(526/529)  | Unreported                                                                                     |
| OTU 189 | 5     | 352   | Ascomycota    | Helotiales    | Unassigned         | Helotiales sp.                            | Uncultured Helotiales clone GU998549          | 98%(500/508)  | Ectomycorrhiza root tip region of <i>Betula nana</i> in USA, Toolik Lake, AK (68.63N; 149.57W) |
| OTU 190 | 1     | 10    | Ascomycota    | Helotiales    | Hyaloscyphaceae    | <i>Mycarthris</i> sp. <sup>b</sup>        | Uncultured Helotiales isolate GU931728        | 96%(498/521)  | House dust in Canada (45.2556N; 75.9204W)                                                      |
|         |       |       |               |               |                    |                                           | Uncultured <i>Mycarthris</i> clone JF449666   | 96%(480/499)  | Beech litter in Austria (Carinthia, Ossiach)                                                   |
| OTU 191 | 6     | 767   | Ascomycota    | Helotiales    | Unassigned         | <i>Lemniera</i> sp. <sup>b</sup>          | Uncultured fungus clone GU174277              | 98%(519/529)  | Forest floor ( <i>Acer saccharum</i> ) in USA (46.86N; 88.88W)                                 |
|         |       |       |               |               |                    |                                           | Uncultured <i>Lemniera</i> clone JF449671     | 96%(490/509)  | Beech litter in Austria (Carinthia, Ossiach)                                                   |
| OTU 192 | 1     | 8     | Basidiomycota | Agaricales    | Cortinariaceae     | Cortinariaceae sp.                        | Uncultured fungus clone KC965950              | 93%(470/506)  | Arctic soil in Canada (73.22N; 119.56W)                                                        |
|         |       |       |               |               |                    |                                           | Uncultured <i>Hebeloma</i> clone JQ724055     | 92%(486/531)  | Ectomycorrhiza of <i>Salix fragilis</i> in Sweden                                              |
| OTU 193 | 1     | 101   | Ascomycota    | Helotiales    | Helotiaceae        | Helotiaceae sp.                           | Uncultured fungus clone KC966294              | 94%(477/505)  | Arctic soil in USA (69.15N; 148.85W)                                                           |
|         |       |       |               |               |                    |                                           | <i>Claussenomyces</i> sp. HQ533008            | 92%(490/530)  | New Zealand                                                                                    |
| OTU 194 | 2     | 48    | Ascomycota    | Helotiales    | Unassigned         | Helotiales sp.                            | Uncultured Helotiales clone KC455325          | 99%(487/489)  | Root system in Arctic tundra (USA, Anaktuvuk River Fire, AK)                                   |
| OTU 195 | 2     | 10    | Ascomycota    | Helotiales    | Unassigned         | <i>Tetracladium</i> sp. <sup>b</sup>      | Uncultured <i>Tetracladium</i> clone KC753432 | 97%(353/364)  | Roots of <i>Triticum aestivum</i> in Sweden                                                    |
| OTU 196 | 2     | 37    | Ascomycota    | Helotiales    | Leotiaceae         | <i>Alatospora flagellata</i> <sup>a</sup> | <i>Alatospora flagellata</i> KC834041         | 98%(500/509)  | Stream, <i>Fagus sylvatica</i> leaf, CZ                                                        |
| OTU 197 | 2     | 125   | Ascomycota    | Helotiales    | Unassigned         | Helotiales sp.                            | Uncultured fungus clone KC965311              | 99%(511/517)  | Arctic soil in Canada (73.22N; 119.56W)                                                        |
|         |       |       |               |               |                    |                                           | Uncultured <i>Tetracladium</i> clone GU327472 | 94% (507/541) | Mycorrhizal seedling ( <i>Epipactis atrorubens</i> ) in Czech                                  |
| OTU 198 | 2     | 8     | Ascomycota    | Verrucariales | Verrucariaceae     | <i>Polyblastia wheldonii</i> <sup>a</sup> | Uncultured fungus clone KC966360              | 100%(479/479) | Arctic soil in Canada (73.22N; 119.56W)                                                        |
|         |       |       |               |               |                    |                                           | <i>Polyblastia wheldonii</i> EU553497         | 98%(428/436)  | Sweden                                                                                         |
| OTU 199 | 1     | 17    | Ascomycota    | Helotiales    | Unassigned         | Helotiales sp.                            | Uncultured fungus clone KF274382              | 96%(464/482)  | <i>Picea abies</i> stumps in Finland                                                           |
|         |       |       |               |               |                    |                                           | Helotiales sp. AY465452                       | 96% (400/417) | Surface-sterilized needle ( <i>Pinus monticola</i> ) in USA (Idaho, Long Caven)                |
| OTU 200 | 2     | 42    | Ascomycota    | Chaetothiales | Unassigned         | Chaetothiales sp.                         | Uncultured fungus clone KF274441              | 94%(458/489)  | Wood stump ( <i>Picea abies</i> ) in Finland                                                   |
|         |       |       |               |               |                    |                                           | <i>Sarcinomyces crustaceus</i> NR121503       | 90%(470/528)  | Unreported                                                                                     |
| OTU 201 | 2     | 333   | Ascomycota    | Capnodiales   | Teratosphaeriaceae | Teratosphaeriaceae sp.                    | <i>Teratosphaeria encephalari</i> FJ372400    | 93%(390/420)  | Living leaves ( <i>Encephalartos lebomboensis</i> ) in South Africa                            |

| OTU ID  | Freq. | Reads | phylum        | Order            | Family            | Identification                                  | Close GenBank match / Accession               | Similarity    | Originally reported habitat                                                                               |
|---------|-------|-------|---------------|------------------|-------------------|-------------------------------------------------|-----------------------------------------------|---------------|-----------------------------------------------------------------------------------------------------------|
| OTU 202 | 3     | 16    | Basidiomycota | Trichosporonales | Trichosporonaceae | <i>Trichosporon loubieri</i> <sup>a</sup>       | <i>Trichosporon loubieri</i> KC254110         | 98%(488/498)  | Nails in Greece                                                                                           |
| OTU 203 | 6     | 201   | Ascomycota    | Helotiales       | Unassigned        | <i>Tetracladium</i> sp. <sup>b</sup>            | Uncultured fungus clone KC965366              | 99%(496/498)  | Arctic soil in Canada (76.23N; 119.30W)                                                                   |
|         |       |       |               |                  |                   |                                                 | Uncultured <i>Tetracladium</i> clone KC694157 | 96%(500/522)  | Plant ( <i>Triticum aestivum</i> ) roots in Sweden                                                        |
| OTU 204 | 3     | 14    | Ascomycota    | Unassigned       | Unassigned        | Ascomycota sp.                                  | Uncultured fungus clone KC965324              | 99%(359/360)  | Arctic soil in USA (70.31N; 147.99W)                                                                      |
|         |       |       |               |                  |                   |                                                 | Uncultured Ascomycota clone FN555433          | 87%(342/391)  | Liverwort ( <i>Lophozia excisa</i> ) in Antarctica (western Antarctic Peninsula, Leonie Island)           |
| OTU 205 | 4     | 6     | Ascomycota    | Unassigned       | Unassigned        | <i>Mycosymbiocytes</i> sp. <sup>b</sup>         | Uncultured fungus clone KF296894              | 99%(465/468)  | Arctic soil in Canada (78.78N; 103.55W)                                                                   |
|         |       |       |               |                  |                   |                                                 | <i>Mycosymbiocytes mycenaphila</i> KF030236   | 96%(418/435)  | Growing with <i>Mycena</i> sp. in USA (Oregon)                                                            |
| OTU 206 | 6     | 1844  | Ascomycota    | Pleosporales     | Phaeosphaeriaceae | <i>Phaeosphaeria triglochicola</i> <sup>a</sup> | Uncultured ascomycete clone AM901822          | 98%(519/528)  | House dust in Finland                                                                                     |
|         |       |       |               |                  |                   |                                                 | <i>Phaeosphaeria triglochicola</i> AF439507   | 99% (463/468) | Plant ( <i>Triglochin palustris</i> ) in Switzerland                                                      |
| OTU 207 | 4     | 3252  | Ascomycota    | Helotiales       | Helotiaceae       | Helotiaceae sp.                                 | <i>Articulospora tetracladia</i> EU998926     | 91%(457/502)  | Aquatic sample                                                                                            |
| OTU 208 | 2     | 20    | Ascomycota    | Helotiales       | Unassigned        | Helotiales sp.                                  | Uncultured soil fungus clone JQ666493         | 98%(497/506)  | Soil in a northern temperate forest (China, Changbai Mountain)                                            |
|         |       |       |               |                  |                   |                                                 | Uncultured Helotiales clone JF748081          | 93%(474/510)  | Ectomycorrhiza of <i>Quercus liaotungensis</i> in the Chinese Loess Plateau                               |
| OTU 209 | 1     | 156   | Basidiomycota | Sebacinales      | Sebacinaceae      | Sebacinaceae sp.                                | Uncultured fungus clone KC966121              | 94%(473/505)  | Arctic soil in USA (69.67N; 148.72W)                                                                      |
|         |       |       |               |                  |                   |                                                 | <i>Sebacina vermifera</i> DQ520096            | 92%(489/531)  | Unreported                                                                                                |
| OTU 210 | 2     | 79    | Ascomycota    | Unassigned       | Unassigned        | Ascomycota sp.                                  | Uncultured fungus clone KF296855              | 94%(490/519)  | Arctic soil in Canada (78.78N; 103.55W)                                                                   |
|         |       |       |               |                  |                   |                                                 | <i>Oleoguttula mirabilis</i> KF309972         | 94%(443/472)  | Unreported                                                                                                |
| OTU 211 | 1     | 3     | Ascomycota    | Unassigned       | Unassigned        | Fungus sp.                                      | Uncultured fungus clone JX364434              | 92%(315/341)  | Soil in USA                                                                                               |
| OTU 212 | 7     | 37    | Ascomycota    | Venturiales      | Venturiaceae      | <i>Venturia</i> sp. <sup>b</sup>                | <i>Venturia</i> sp. AB916509                  | 99%(500/501)  | Bird feather in Norway                                                                                    |
| OTU 213 | 4     | 99    | Ascomycota    | Helotiales       | Unassigned        | <i>Tetracladium</i> sp. <sup>b</sup>            | Uncultured ascomycete clone FJ378864          | 96%(511/531)  | Ectomycorrhiza of <i>Kobresia</i> sp. in Eastern Himalaya                                                 |
|         |       |       |               |                  |                   |                                                 | Uncultured <i>Tetracladium</i> clone FJ803966 | 96% (510/532) | Root tip from trees ( <i>Populus davidiana</i> ) in boreal temperate forest from linner Monoglia in China |



| OTU ID  | Freq. | Reads | phylum        | Order             | Family             | Identification                             | Close GenBank match / Accession                  | Similarity           | Originally reported habitat                                                                                  |
|---------|-------|-------|---------------|-------------------|--------------------|--------------------------------------------|--------------------------------------------------|----------------------|--------------------------------------------------------------------------------------------------------------|
| OTU 214 | 1     | 12    | Basidiomycota | Agaricales        | Inocybaceae        | Inocybaceae sp.                            | Uncultured fungus clone KC965838                 | 94%(335/356)         | Arctic soil in USA (69.67N; 148.72W)                                                                         |
|         |       |       |               |                   |                    |                                            | <i>Inocybe ochroalba</i> EU326165                | 93% (315/338)        | Ectomycorrhizal root tip of <i>Salix herbacea</i> in Austria (46.83N; 11.02E)                                |
| OTU 215 | 10    | 1480  | Basidiomycota | Tremellales       | Unassigned         | <i>Cryptococcus</i> sp. <sup>b</sup>       | Uncultured <i>Cryptococcus</i> clone KC753413    | <b>99%(354/357)</b>  | Plant ( <i>Triticum aestivum</i> ) stem in Sweden                                                            |
| OTU 216 | 1     | 12    | Basidiomycota | Pucciniales       | Melampsoraceae     | Melampsoraceae sp.                         | <i>Melampsora</i> sp. JF825971                   | 94%(360/382)         | Plant ( <i>Salix viminalis</i> ) in Sweden (Skane)                                                           |
| OTU 217 | 1     | 2     | Ascomycota    | Saccharomycetales | Saccharomycetaceae | <i>Komagataella pastoris</i> <sup>a</sup>  | <i>Komagataella pastoris</i> KF468220            | <b>99%(288/291)</b>  | Unreported                                                                                                   |
| OTU 218 | 1     | 164   | Ascomycota    | Helotiales        | Helotiaceae        | <i>Claussenomyces</i> sp. <sup>b</sup>     | Uncultured fungus clone KC966294                 | <b>100%(500/500)</b> | Arctic soil in USA (69.15N; 148.85W)                                                                         |
|         |       |       |               |                   |                    |                                            | <i>Claussenomyces</i> sp. HQ533008               | 96%(502/524)         | New Zealand                                                                                                  |
| OTU 219 | 3     | 12    | Ascomycota    | Helotiales        | Unassigned         | Helotiales sp.                             | Uncultured Helotiales clone JN847454             | <b>100%(529/529)</b> | Ectomycorrhizal root tips of <i>Tristaniopsis</i> spp. in New Caledonia                                      |
| OTU 220 | 3     | 29    | Ascomycota    | Helotiales        | Helotiaceae        | <i>Hymenoscyphus caudatus</i> <sup>a</sup> | <i>Hymenoscyphus caudatus</i> KC481687           | <b>97%(497/511)</b>  | Plant ( <i>Alnus</i> sp.) in Germany                                                                         |
| OTU 221 | 3     | 810   | Ascomycota    | Helotiales        | Helotiaceae        | Helotiaceae sp.                            | Uncultured <i>Helicodendron</i> isolate GU931747 | 92%(445/486)         | House dust in Canada (45.2556 N, 75.9204W)                                                                   |
| OTU 222 | 8     | 266   | Basidiomycota | Tremellales       | Unassigned         | <i>Cryptococcus</i> sp. <sup>b</sup>       | Uncultured <i>Cryptococcus</i> clone KC753413    | <b>98%(502/514)</b>  | Plant ( <i>Triticum aestivum</i> ) stem in Sweden                                                            |
| OTU 223 | 6     | 4749  | Ascomycota    | Unassigned        | Unassigned         | Dothideomycetes sp.                        | Dothideomycetes sp. JQ759518                     | <b>100%(447/447)</b> | Surface sterilized photosynthetic tissue of Plant ( <i>Cassiope tetragona</i> ) in USA (64.5011N; 165.4064W) |
|         |       |       |               |                   |                    |                                            | <i>Venturia hystrioides</i> EU035459             | 86% (485/563)        | Unreported                                                                                                   |
| OTU 224 | 1     | 27    | Ascomycota    | Unassigned        | Unassigned         | Ascomycota sp.                             | Uncultured fungus clone KC965795                 | 93%(450/484)         | Arctic soil in Canada (76.23N; 119.30W)                                                                      |
|         |       |       |               |                   |                    |                                            | Uncultured ascomycete clone AM901946             | 84%(342/406)         | House dust in Finland                                                                                        |
| OTU 225 | 1     | 14    | Ascomycota    | Unassigned        | Unassigned         | Ascomycota sp.                             | <i>Sympodiella acicola</i> EU449953              | 86%(324/378)         | Litter needles ( <i>Pinus sylvestris</i> ) in Czech                                                          |
| OTU 226 | 1     | 3     | Ascomycota    | Helotiales        | Unassigned         | Helotiales sp.                             | Uncultured <i>Tetracladium</i> clone KC753432    | 92%(458/496)         | Roots of <i>Triticum aestivum</i> in Sweden                                                                  |
| OTU 227 | 4     | 44    | Ascomycota    | Saccharomycetales | Saccharomycetaceae | <i>Pichia pastoris</i> <sup>a</sup>        | <i>Pichia pastoris</i> FR839631                  | <b>99%(376/379)</b>  | Unreported                                                                                                   |
| OTU 228 | 6     | 776   | Ascomycota    | Helotiales        | Helotiaceae        | Helotiaceae sp.                            | Uncultured fungus clone KF274177                 | 96%(395/412)         | <i>Picea abies</i> stumps in Finland                                                                         |
|         |       |       |               |                   |                    |                                            | <i>Articulospora tetracladia</i> EU998926        | 94% (390/413)        | Aquatic sample                                                                                               |
| OTU 229 | 2     | 62    | Ascomycota    | Helotiales        | Unassigned         | <i>Tetracladium furcatum</i> <sup>a</sup>  | <i>Tetracladium furcatum</i> EU883432            | <b>97%(519/533)</b>  | Aquatic sample                                                                                               |

| OTU ID  | Freq. | Reads | phylum        | Order             | Family              | Identification                            | Close GenBank match / Accession                | Similarity           | Originally reported habitat                                            |
|---------|-------|-------|---------------|-------------------|---------------------|-------------------------------------------|------------------------------------------------|----------------------|------------------------------------------------------------------------|
| OTU 230 | 6     | 45    | Ascomycota    | Saccharomycetales | Saccharomycetaceae  | <i>Pichia pastoris</i> <sup>a</sup>       | <i>Pichia pastoris</i> FR839630                | <b>98%(386/394)</b>  | Unreported                                                             |
| OTU 231 | 5     | 235   | Ascomycota    | Helotiales        | Helotiaceae         | <i>Tricladium</i> sp. <sup>b</sup>        | Uncultured fungus clone KC965406               | <b>99%(507/509)</b>  | Arctic soil in Canada (76.23N; 119.30W)                                |
|         |       |       |               |                   |                     |                                           | <i>Tricladium angulatum</i> AY204609           | 96%(485/506)         | Aquatic sample                                                         |
| OTU 232 | 8     | 339   | Ascomycota    | Helotiales        | Unassigned          | <i>Tetracladium furcatum</i> <sup>a</sup> | <i>Tetracladium furcatum</i> EU883432          | <b>98%(482/491)</b>  | Aquatic sample                                                         |
| OTU 233 | 3     | 91    | Ascomycota    | Unassigned        | Unassigned          | Ascomycota sp.                            | Ascomycete sp. AM084848                        | 95%(361/380)         | Air sample in boreal forest (Norway)                                   |
| OTU 234 | 3     | 46    | Ascomycota    | Helotiales        | Unassigned          | Helotiales sp.                            | Uncultured fungus clone KC965311               | 92%(492/533)         | Arctic soil in Canada (73.22N; 119.56W)                                |
|         |       |       |               |                   |                     |                                           | Uncultured <i>Tetracladium</i> clone FJ803966  | 90%(500/556)         | Root tip from trees in boreal temperate forest (China, inner Mongolia) |
| OTU 235 | 1     | 153   | Ascomycota    | Xylariales        | Amphisphaeriaceae   | Amphisphaeriaceae sp.                     | Uncultured Amphisphaeriaceae clone FR773218    | <b>98%(462/471)</b>  | Unreported                                                             |
| OTU 236 | 2     | 15    | Basidiomycota | Tremellales       | Unassigned          | Tremellales sp.                           | Uncultured fungus clone KF800558               | 91%(475/520)         | Indoor air in USA (Missouri, Kansas City)                              |
|         |       |       |               |                   |                     |                                           | <i>Cryptococcus dimennae</i> HG008764          | 86% (367/425)        | Air sample in France (Montignac, Lascaux Cave)                         |
| OTU 237 | 3     | 408   | Basidiomycota | Sebacinales       | Sebacinaceae        | Sebacinaceae sp.                          | Uncultured fungus clone KC966121               | 95%(452/476)         | Arctic soil in USA (69.67N; 148.72W)                                   |
|         |       |       |               |                   |                     |                                           | Uncultured <i>Sebacina</i> clone HQ180275      | 92%(464/504)         | Roots of herbaceous plants ( <i>Trifolium pratense</i> )               |
| OTU 238 | 2     | 18    | Ascomycota    | Pleosporales      | Pleosporineae       | <i>Leptosphaeria</i> sp. <sup>b</sup>     | Uncultured <i>Leptosphaeria</i> clone EU852362 | <b>97%(390/402)</b>  | Plant ( <i>Fraxinus excelsior</i> ) in Sweden                          |
| OTU 239 | 2     | 48    | Ascomycota    | Helotiales        | Unassigned          | Helotiales sp.                            | Uncultured fungus clone KC966120               | <b>99%(427/429)</b>  | Arctic soil in USA (69.67N; 148.72W)                                   |
|         |       |       |               |                   |                     |                                           | <i>Cadophora malorum</i> GU067760              | 90%(407/453)         | Stump ( <i>Picea abies</i> ) in Finland                                |
| OTU 240 | 2     | 155   | Ascomycota    | Pleosporales      | Unassigned          | <i>Phoma herbarum</i> <sup>a</sup>        | Uncultured <i>Epicoccum</i> clone FN539073     | 90%(478/533)         | Beech sapwood in United Kingdom (53.63N; 7.69W)                        |
|         |       |       |               |                   |                     |                                           | <i>Phoma herbarum</i> FN868459                 | <b>97% (382/394)</b> | Spanish stands of <i>Pinus halepensis</i>                              |
| OTU 241 | 3     | 11    | Ascomycota    | Unassigned        | Unassigned          | Ascomycota sp.                            | Uncultured fungus clone KF296938               | <b>99%(452/453)</b>  | Arctic soil in Canada (76.23N; 119.30W)                                |
|         |       |       |               |                   |                     |                                           | <i>Umbilicaria hyperborea</i> AF096216         | 86%(416/485)         | Unreported                                                             |
| OTU 242 | 1     | 5     | Ascomycota    | Helotiales        | Unassigned          | Helotiales sp.                            | <i>Lambertella</i> sp. AB705255                | 94%(378/402)         | Unreported                                                             |
| OTU 243 | 1     | 38    | Ascomycota    | Chaetothyriales   | Herpotrichiellaceae | <i>Rhinocladia</i> sp. <sup>b</sup>       | Uncultured fungus clone KC965227               | <b>97%(538/557)</b>  | Arctic soil in Canada (76.23N; 119.30W)                                |
|         |       |       |               |                   |                     |                                           | <i>Rhinocladia</i> sp. FJ948175                | <b>97%(499/512)</b>  | Rock-inhabiting fungus from Aketao (Xinjiang, China)                   |
| OTU 244 | 2     | 1045  | Ascomycota    | Venturiales       | Venturiaceae        | <i>Venturia alpina</i> <sup>a</sup>       | <i>Venturia alpina</i> EU035446                | <b>98%(561/571)</b>  | Plant ( <i>Arctostaphylos alpina</i> ) in Switzerland                  |

| OTU ID  | Freq. | Reads | phylum        | Order           | Family              | Identification                     | Close GenBank match / Accession             | Similarity          | Originally reported habitat                                              |
|---------|-------|-------|---------------|-----------------|---------------------|------------------------------------|---------------------------------------------|---------------------|--------------------------------------------------------------------------|
| OTU 245 | 6     | 779   | Ascomycota    | Helotiales      | Hyaloscyphaceae     | Hyaloscyphaceae sp.                | Uncultured Helotiales isolate GU931728      | 96%(474/494)        | House dust in Canada (45.2556N; 75.9204W)                                |
| OTU 246 | 2     | 3     | Ascomycota    | Capnodiales     | Teratosphaeriaceae  | Teratosphaeriaceae sp.             | <i>Teratosphaeria parva</i> EU707877        | 92%(302/346)        | Plant ( <i>Protea nitida</i> ) leaf in South Africa                      |
| OTU 247 | 4     | 3776  | Basidiomycota | Pucciniales     | Melampsoraceae      | <i>Melampsora</i> sp. <sup>b</sup> | Uncultured <i>Melampsora</i> clone JN646154 | <b>99%(492/497)</b> | Plant ( <i>Salix reticulata</i> ) in United Kingdom (Scotland)           |
| OTU 248 | 1     | 22    | Ascomycota    | Chaetothyriales | Herpotrichiellaceae | Herpotrichiellaceae sp.            | Uncultured endophytic fungus clone KF060234 | 90%(496/552)        | Plant ( <i>Decalepis arayalpathra</i> ) root in India                    |
|         |       |       |               |                 |                     |                                    | <i>Phaeomoniella</i> sp. JN225891           | 90% (446/494)       | Plant ( <i>Nothofagus menziesii</i> ) leaves in New Zealand              |
| OTU 249 | 3     | 678   | Ascomycota    | Pleosporales    | Unassigned          | <i>Phoma herbarum</i> <sup>a</sup> | <i>Phoma herbarum</i> FN868459              | <b>99%(518/522)</b> | Spanish stands of <i>Pinus halepensis</i>                                |
| OTU 250 | 1     | 6     | Basidiomycota | Pucciniales     | Melampsoraceae      | <i>Melampsora</i> sp. <sup>b</sup> | Uncultured <i>Melampsora</i> clone KC883611 | <b>98%(394/404)</b> | uredospores on infected leaves ( <i>Salix caprea</i> x <i>purpurea</i> ) |

<sup>a</sup>For sequence identities  $\geq 97\%$ , the genus and species were accepted.

<sup>b</sup>For sequence identities between 95% and 97%, only the genus was accepted.
