# Supplementary material for: Endophytic Fungal Communities Associated with Vascular Plants in the High Arctic Zone Are Highly Diverse and Host-Plant Specific
Source: PubMed Central journal article supplement (PMC4466372; doi:10.1371/journal.pone.0130051), 2015-06-12
Supplement: pone.0130051.s002.pdf [file pone.0130051.s002.pdf]

|        |     |     |     |     |      |     |    |     |     |      |   |     |
|--------|-----|-----|-----|-----|------|-----|----|-----|-----|------|---|-----|
| OTU84  | 0   | 36  | 0   | 0   | 0    | 0   | 0  | 0   | 0   | 0    | 0 | 0   |
| OTU85  | 0   | 6   | 0   | 0   | 0    | 0   | 0  | 264 | 49  | 1507 | 0 | 0   |
| OTU86  | 0   | 0   | 0   | 33  | 0    | 4   | 0  | 260 | 0   | 0    | 0 | 0   |
| OTU87  | 56  | 6   | 0   | 0   | 7    | 8   | 2  | 2   | 144 | 18   | 5 | 0   |
| OTU88  | 0   | 0   | 0   | 0   | 0    | 0   | 0  | 17  | 0   | 6    | 0 | 0   |
| OTU89  | 387 | 0   | 1   | 0   | 0    | 0   | 0  | 0   | 0   | 0    | 0 | 0   |
| OTU90  | 0   | 15  | 0   | 0   | 0    | 0   | 0  | 0   | 0   | 0    | 0 | 0   |
| OTU91  | 0   | 2   | 20  | 0   | 0    | 0   | 0  | 0   | 0   | 0    | 0 | 0   |
| OTU92  | 0   | 0   | 0   | 11  | 2    | 0   | 0  | 2   | 0   | 0    | 0 | 0   |
| OTU93  | 0   | 0   | 0   | 5   | 1190 | 172 | 0  | 16  | 0   | 0    | 0 | 0   |
| OTU94  | 5   | 0   | 0   | 0   | 0    | 0   | 0  | 0   | 0   | 0    | 0 | 572 |
| OTU95  | 2   | 0   | 0   | 84  | 30   | 11  | 2  | 1   | 0   | 0    | 0 | 1   |
| OTU96  | 0   | 0   | 0   | 0   | 0    | 0   | 0  | 5   | 2   | 0    | 0 | 3   |
| OTU97  | 0   | 160 | 0   | 0   | 0    | 0   | 0  | 0   | 0   | 0    | 0 | 0   |
| OTU98  | 1   | 0   | 2   | 0   | 0    | 0   | 0  | 0   | 0   | 0    | 0 | 0   |
| OTU99  | 0   | 0   | 0   | 4   | 0    | 0   | 0  | 0   | 1   | 0    | 0 | 0   |
| OTU100 | 0   | 2   | 0   | 0   | 2    | 0   | 0  | 0   | 3   | 2    | 1 | 0   |
| OTU101 | 0   | 0   | 0   | 0   | 8    | 0   | 0  | 0   | 0   | 0    | 0 | 0   |
| OTU102 | 39  | 0   | 0   | 0   | 0    | 0   | 0  | 0   | 0   | 0    | 0 | 0   |
| OTU103 | 0   | 0   | 0   | 47  | 0    | 0   | 23 | 267 | 0   | 0    | 0 | 0   |
| OTU104 | 0   | 0   | 1   | 0   | 0    | 0   | 0  | 0   | 1   | 0    | 0 | 0   |
| OTU105 | 0   | 0   | 0   | 1   | 0    | 0   | 0  | 9   | 2   | 391  | 0 | 0   |
| OTU106 | 0   | 3   | 0   | 0   | 0    | 0   | 0  | 0   | 0   | 0    | 0 | 0   |
| OTU107 | 0   | 0   | 0   | 0   | 0    | 0   | 0  | 0   | 0   | 14   | 0 | 0   |
| OTU108 | 0   | 3   | 0   | 0   | 0    | 0   | 0  | 0   | 0   | 0    | 0 | 0   |
| OTU109 | 0   | 0   | 0   | 0   | 0    | 0   | 1  | 0   | 3   | 0    | 0 | 0   |
| OTU110 | 1   | 92  | 0   | 0   | 0    | 0   | 0  | 0   | 0   | 0    | 0 | 0   |
| OTU111 | 0   | 495 | 1   | 0   | 120  | 436 | 3  | 3   | 2   | 0    | 0 | 0   |
| OTU112 | 0   | 70  | 0   | 0   | 74   | 0   | 1  | 8   | 24  | 7    | 0 | 0   |
| OTU113 | 0   | 0   | 0   | 0   | 0    | 5   | 0  | 0   | 0   | 0    | 0 | 0   |
| OTU114 | 0   | 0   | 0   | 0   | 0    | 0   | 0  | 3   | 0   | 0    | 0 | 0   |
| OTU115 | 5   | 0   | 0   | 0   | 0    | 0   | 0  | 0   | 0   | 0    | 0 | 0   |
| OTU116 | 0   | 0   | 1   | 74  | 44   | 2   | 0  | 11  | 11  | 2    | 0 | 1   |
| OTU117 | 0   | 9   | 0   | 0   | 0    | 0   | 0  | 0   | 0   | 0    | 0 | 0   |
| OTU118 | 0   | 0   | 0   | 0   | 0    | 0   | 5  | 0   | 0   | 0    | 0 | 0   |
| OTU119 | 1   | 0   | 230 | 0   | 0    | 0   | 0  | 0   | 0   | 0    | 0 | 0   |
| OTU120 | 44  | 1   | 0   | 228 | 59   | 18  | 56 | 34  | 0   | 29   | 0 | 0   |
| OTU121 | 4   | 0   | 0   | 0   | 0    | 0   | 0  | 0   | 0   | 0    | 0 | 0   |
| OTU122 | 4   | 0   | 0   | 0   | 0    | 0   | 0  | 0   | 0   | 0    | 0 | 562 |
| OTU123 | 0   | 0   | 1   | 0   | 0    | 138 | 0  | 1   | 0   | 2    | 0 | 1   |
| OTU124 | 0   | 85  | 0   | 0   | 0    | 0   | 0  | 0   | 0   | 0    | 0 | 0   |
| OTU125 | 1   | 0   | 0   | 117 | 13   | 3   | 1  | 2   | 0   | 0    | 0 | 24  |
| OTU126 | 0   | 1   | 0   | 0   | 0    | 0   | 0  | 1   | 0   | 0    | 0 | 0   |

|        |      |     |     |     |     |      |     |     |     |     |     |      |
|--------|------|-----|-----|-----|-----|------|-----|-----|-----|-----|-----|------|
| OTU127 | 1    | 10  | 0   | 0   | 0   | 0    | 0   | 0   | 0   | 0   | 0   | 0    |
| OTU128 | 1    | 6   | 0   | 2   | 1   | 0    | 0   | 2   | 22  | 671 | 0   | 0    |
| OTU129 | 0    | 0   | 0   | 1   | 18  | 8    | 0   | 0   | 0   | 0   | 0   | 0    |
| OTU130 | 0    | 0   | 0   | 0   | 0   | 0    | 0   | 0   | 9   | 0   | 0   | 0    |
| OTU131 | 2    | 0   | 274 | 0   | 0   | 0    | 0   | 0   | 0   | 0   | 0   | 0    |
| OTU132 | 0    | 0   | 0   | 27  | 0   | 7    | 0   | 68  | 0   | 0   | 0   | 0    |
| OTU133 | 0    | 44  | 0   | 0   | 0   | 0    | 0   | 0   | 0   | 0   | 0   | 0    |
| OTU134 | 1164 | 0   | 48  | 0   | 0   | 0    | 1   | 0   | 0   | 0   | 0   | 0    |
| OTU135 | 0    | 0   | 0   | 11  | 0   | 0    | 0   | 0   | 0   | 0   | 0   | 0    |
| OTU136 | 0    | 0   | 0   | 0   | 0   | 0    | 0   | 6   | 0   | 0   | 0   | 0    |
| OTU137 | 0    | 0   | 1   | 433 | 123 | 10   | 75  | 71  | 519 | 11  | 0   | 7    |
| OTU138 | 0    | 0   | 0   | 14  | 0   | 3    | 0   | 122 | 0   | 0   | 0   | 0    |
| OTU139 | 0    | 0   | 2   | 0   | 0   | 0    | 0   | 0   | 67  | 0   | 0   | 0    |
| OTU140 | 0    | 7   | 0   | 0   | 0   | 0    | 0   | 0   | 0   | 0   | 0   | 0    |
| OTU141 | 3    | 0   | 0   | 1   | 0   | 15   | 1   | 0   | 4   | 0   | 0   | 0    |
| OTU142 | 0    | 1   | 0   | 0   | 0   | 0    | 1   | 18  | 0   | 0   | 579 | 37   |
| OTU143 | 3    | 0   | 0   | 0   | 0   | 0    | 0   | 0   | 0   | 0   | 0   | 0    |
| OTU144 | 0    | 24  | 0   | 0   | 0   | 0    | 0   | 0   | 0   | 0   | 0   | 0    |
| OTU145 | 306  | 0   | 0   | 0   | 0   | 0    | 0   | 0   | 0   | 0   | 0   | 0    |
| OTU146 | 0    | 1   | 0   | 0   | 0   | 0    | 2   | 5   | 0   | 1   | 0   | 0    |
| OTU147 | 0    | 0   | 0   | 0   | 37  | 0    | 1   | 0   | 0   | 0   | 0   | 0    |
| OTU148 | 0    | 4   | 0   | 0   | 0   | 0    | 0   | 0   | 1   | 0   | 0   | 0    |
| OTU149 | 0    | 0   | 0   | 0   | 0   | 0    | 0   | 14  | 2   | 0   | 0   | 12   |
| OTU150 | 0    | 0   | 0   | 0   | 0   | 1    | 19  | 0   | 0   | 0   | 0   | 0    |
| OTU151 | 0    | 0   | 0   | 1   | 0   | 1    | 7   | 1   | 0   | 0   | 0   | 0    |
| OTU152 | 0    | 0   | 0   | 30  | 0   | 0    | 0   | 0   | 0   | 0   | 0   | 0    |
| OTU153 | 0    | 0   | 0   | 0   | 0   | 0    | 5   | 0   | 0   | 0   | 0   | 0    |
| OTU154 | 0    | 0   | 0   | 0   | 12  | 0    | 0   | 0   | 0   | 0   | 0   | 0    |
| OTU155 | 0    | 13  | 0   | 0   | 0   | 0    | 0   | 0   | 1   | 0   | 0   | 0    |
| OTU156 | 0    | 0   | 0   | 7   | 0   | 0    | 0   | 0   | 0   | 0   | 0   | 0    |
| OTU157 | 15   | 0   | 3   | 0   | 0   | 0    | 0   | 0   | 0   | 0   | 0   | 2365 |
| OTU158 | 0    | 3   | 0   | 0   | 0   | 0    | 0   | 0   | 0   | 0   | 0   | 0    |
| OTU159 | 0    | 0   | 0   | 9   | 339 | 27   | 1   | 13  | 82  | 0   | 0   | 0    |
| OTU160 | 0    | 12  | 0   | 0   | 0   | 0    | 0   | 0   | 0   | 0   | 0   | 0    |
| OTU161 | 0    | 0   | 0   | 0   | 0   | 0    | 0   | 1   | 0   | 24  | 0   | 0    |
| OTU162 | 3    | 0   | 9   | 0   | 0   | 0    | 0   | 0   | 0   | 0   | 0   | 0    |
| OTU163 | 0    | 114 | 0   | 0   | 0   | 0    | 0   | 1   | 0   | 0   | 0   | 0    |
| OTU164 | 0    | 0   | 0   | 0   | 4   | 0    | 213 | 1   | 1   | 6   | 0   | 0    |
| OTU165 | 0    | 19  | 0   | 0   | 0   | 0    | 0   | 0   | 0   | 0   | 0   | 0    |
| OTU166 | 1    | 1   | 1   | 0   | 2   | 1679 | 0   | 0   | 0   | 3   | 0   | 9    |
| OTU167 | 0    | 0   | 0   | 0   | 0   | 0    | 0   | 0   | 7   | 0   | 0   | 0    |
| OTU168 | 0    | 0   | 0   | 14  | 16  | 86   | 7   | 35  | 1   | 0   | 30  | 0    |
| OTU169 | 0    | 0   | 0   | 0   | 0   | 0    | 0   | 276 | 0   | 0   | 0   | 0    |

|        |     |     |     |      |     |      |     |     |      |      |      |     |
|--------|-----|-----|-----|------|-----|------|-----|-----|------|------|------|-----|
| OTU170 | 0   | 9   | 0   | 0    | 40  | 0    | 0   | 0   | 0    | 4    | 0    | 0   |
| OTU171 | 0   | 48  | 0   | 10   | 0   | 0    | 0   | 0   | 41   | 0    | 0    | 0   |
| OTU172 | 0   | 0   | 0   | 0    | 0   | 0    | 0   | 0   | 0    | 0    | 587  | 0   |
| OTU173 | 0   | 0   | 0   | 1    | 3   | 0    | 2   | 0   | 0    | 0    | 0    | 0   |
| OTU174 | 0   | 0   | 0   | 6    | 52  | 14   | 11  | 9   | 297  | 0    | 2    | 0   |
| OTU175 | 0   | 0   | 0   | 0    | 4   | 3    | 0   | 3   | 0    | 0    | 0    | 0   |
| OTU176 | 1   | 0   | 343 | 0    | 0   | 0    | 0   | 0   | 3    | 0    | 0    | 0   |
| OTU177 | 0   | 0   | 0   | 0    | 0   | 0    | 0   | 0   | 5    | 0    | 0    | 0   |
| OTU178 | 0   | 23  | 0   | 0    | 0   | 0    | 0   | 0   | 0    | 0    | 0    | 0   |
| OTU179 | 0   | 0   | 0   | 0    | 5   | 2    | 17  | 0   | 680  | 0    | 2    | 0   |
| OTU180 | 0   | 0   | 0   | 0    | 0   | 0    | 0   | 3   | 3    | 215  | 0    | 0   |
| OTU181 | 11  | 1   | 1   | 0    | 0   | 0    | 0   | 0   | 11   | 0    | 0    | 0   |
| OTU182 | 0   | 0   | 0   | 0    | 10  | 3    | 12  | 2   | 1037 | 0    | 2    | 0   |
| OTU183 | 1   | 0   | 0   | 0    | 0   | 0    | 0   | 0   | 0    | 0    | 0    | 495 |
| OTU184 | 0   | 65  | 0   | 0    | 0   | 0    | 0   | 0   | 0    | 0    | 0    | 0   |
| OTU185 | 0   | 6   | 0   | 0    | 0   | 0    | 0   | 104 | 3    | 1083 | 0    | 0   |
| OTU186 | 3   | 0   | 2   | 2010 | 152 | 45   | 9   | 31  | 0    | 5    | 0    | 137 |
| OTU187 | 92  | 213 | 8   | 0    | 0   | 0    | 0   | 0   | 0    | 0    | 1    | 0   |
| OTU188 | 0   | 0   | 0   | 0    | 0   | 0    | 2   | 0   | 0    | 0    | 0    | 0   |
| OTU189 | 0   | 0   | 2   | 297  | 0   | 49   | 0   | 3   | 0    | 1    | 0    | 0   |
| OTU190 | 0   | 0   | 0   | 0    | 0   | 0    | 0   | 0   | 10   | 0    | 0    | 0   |
| OTU191 | 49  | 0   | 0   | 5    | 419 | 43   | 249 | 0   | 0    | 0    | 0    | 2   |
| OTU192 | 0   | 0   | 0   | 0    | 0   | 0    | 8   | 0   | 0    | 0    | 0    | 0   |
| OTU193 | 0   | 0   | 0   | 0    | 0   | 0    | 0   | 0   | 101  | 0    | 0    | 0   |
| OTU194 | 0   | 1   | 0   | 0    | 47  | 0    | 0   | 0   | 0    | 0    | 0    | 0   |
| OTU195 | 0   | 0   | 0   | 0    | 8   | 0    | 0   | 0   | 2    | 0    | 0    | 0   |
| OTU196 | 0   | 0   | 0   | 0    | 22  | 0    | 15  | 0   | 0    | 0    | 0    | 0   |
| OTU197 | 0   | 0   | 0   | 0    | 0   | 0    | 123 | 0   | 2    | 0    | 0    | 0   |
| OTU198 | 0   | 0   | 0   | 0    | 0   | 0    | 4   | 0   | 4    | 0    | 0    | 0   |
| OTU199 | 0   | 17  | 0   | 0    | 0   | 0    | 0   | 0   | 0    | 0    | 0    | 0   |
| OTU200 | 41  | 0   | 1   | 0    | 0   | 0    | 0   | 0   | 0    | 0    | 0    | 0   |
| OTU201 | 317 | 0   | 16  | 0    | 0   | 0    | 0   | 0   | 0    | 0    | 0    | 0   |
| OTU202 | 3   | 0   | 0   | 0    | 0   | 0    | 0   | 0   | 11   | 2    | 0    | 0   |
| OTU203 | 0   | 0   | 0   | 1    | 4   | 0    | 90  | 83  | 20   | 0    | 3    | 0   |
| OTU204 | 9   | 4   | 1   | 0    | 0   | 0    | 0   | 0   | 0    | 0    | 0    | 0   |
| OTU205 | 0   | 0   | 0   | 0    | 0   | 1    | 1   | 3   | 1    | 0    | 0    | 0   |
| OTU206 | 1   | 0   | 0   | 0    | 1   | 0    | 24  | 34  | 0    | 0    | 1695 | 89  |
| OTU207 | 0   | 0   | 0   | 0    | 1   | 3242 | 0   | 0   | 0    | 3    | 0    | 6   |
| OTU208 | 4   | 16  | 0   | 0    | 0   | 0    | 0   | 0   | 0    | 0    | 0    | 0   |
| OTU209 | 0   | 156 | 0   | 0    | 0   | 0    | 0   | 0   | 0    | 0    | 0    | 0   |
| OTU210 | 0   | 0   | 0   | 0    | 0   | 0    | 1   | 0   | 0    | 78   | 0    | 0   |
| OTU211 | 0   | 3   | 0   | 0    | 0   | 0    | 0   | 0   | 0    | 0    | 0    | 0   |
| OTU212 | 1   | 0   | 11  | 9    | 1   | 0    | 0   | 4   | 5    | 6    | 0    | 0   |

|        |      |     |      |      |     |     |     |      |      |     |     |     |
|--------|------|-----|------|------|-----|-----|-----|------|------|-----|-----|-----|
| OTU213 | 0    | 0   | 0    | 1    | 19  | 0   | 66  | 0    | 13   | 0   | 0   | 0   |
| OTU214 | 0    | 0   | 0    | 0    | 12  | 0   | 0   | 0    | 0    | 0   | 0   | 0   |
| OTU215 | 2    | 0   | 0    | 1151 | 66  | 19  | 23  | 15   | 4    | 1   | 2   | 197 |
| OTU216 | 0    | 0   | 0    | 0    | 0   | 0   | 0   | 12   | 0    | 0   | 0   | 0   |
| OTU217 | 0    | 0   | 0    | 0    | 2   | 0   | 0   | 0    | 0    | 0   | 0   | 0   |
| OTU218 | 0    | 0   | 0    | 0    | 0   | 0   | 0   | 0    | 164  | 0   | 0   | 0   |
| OTU219 | 0    | 7   | 0    | 2    | 0   | 0   | 0   | 0    | 3    | 0   | 0   | 0   |
| OTU220 | 0    | 0   | 0    | 0    | 25  | 1   | 0   | 3    | 0    | 0   | 0   | 0   |
| OTU221 | 180  | 15  | 615  | 0    | 0   | 0   | 0   | 0    | 0    | 0   | 0   | 0   |
| OTU222 | 1    | 0   | 0    | 180  | 9   | 6   | 23  | 3    | 2    | 0   | 0   | 42  |
| OTU223 | 2650 | 9   | 2085 | 1    | 0   | 0   | 2   | 0    | 2    | 0   | 0   | 0   |
| OTU224 | 0    | 0   | 27   | 0    | 0   | 0   | 0   | 0    | 0    | 0   | 0   | 0   |
| OTU225 | 0    | 14  | 0    | 0    | 0   | 0   | 0   | 0    | 0    | 0   | 0   | 0   |
| OTU226 | 0    | 0   | 0    | 0    | 0   | 0   | 0   | 0    | 3    | 0   | 0   | 0   |
| OTU227 | 6    | 5   | 0    | 25   | 8   | 0   | 0   | 0    | 0    | 0   | 0   | 0   |
| OTU228 | 3    | 0   | 0    | 461  | 146 | 133 | 32  | 0    | 0    | 0   | 0   | 1   |
| OTU229 | 0    | 0   | 0    | 0    | 0   | 0   | 61  | 0    | 0    | 0   | 1   | 0   |
| OTU230 | 11   | 12  | 0    | 15   | 4   | 0   | 0   | 0    | 1    | 0   | 2   | 0   |
| OTU231 | 0    | 7   | 0    | 0    | 1   | 0   | 27  | 99   | 0    | 101 | 0   | 0   |
| OTU232 | 0    | 0   | 0    | 1    | 36  | 1   | 271 | 6    | 2    | 13  | 9   | 0   |
| OTU233 | 10   | 0   | 80   | 0    | 0   | 0   | 0   | 0    | 1    | 0   | 0   | 0   |
| OTU234 | 0    | 0   | 0    | 0    | 0   | 1   | 44  | 0    | 0    | 0   | 1   | 0   |
| OTU235 | 0    | 0   | 0    | 0    | 0   | 0   | 0   | 0    | 153  | 0   | 0   | 0   |
| OTU236 | 0    | 0   | 0    | 0    | 0   | 0   | 0   | 9    | 0    | 6   | 0   | 0   |
| OTU237 | 1    | 1   | 0    | 0    | 0   | 0   | 0   | 0    | 0    | 0   | 406 | 0   |
| OTU238 | 0    | 0   | 0    | 11   | 0   | 0   | 0   | 7    | 0    | 0   | 0   | 0   |
| OTU239 | 0    | 47  | 0    | 0    | 0   | 0   | 0   | 0    | 0    | 0   | 1   | 0   |
| OTU240 | 0    | 0   | 0    | 0    | 0   | 118 | 37  | 0    | 0    | 0   | 0   | 0   |
| OTU241 | 0    | 0   | 0    | 0    | 0   | 7   | 3   | 0    | 1    | 0   | 0   | 0   |
| OTU242 | 0    | 0   | 0    | 0    | 0   | 0   | 0   | 5    | 0    | 0   | 0   | 0   |
| OTU243 | 0    | 0   | 0    | 0    | 0   | 0   | 38  | 0    | 0    | 0   | 0   | 0   |
| OTU244 | 0    | 0   | 0    | 0    | 0   | 0   | 0   | 0    | 1042 | 3   | 0   | 0   |
| OTU245 | 0    | 123 | 0    | 0    | 112 | 0   | 9   | 17   | 501  | 17  | 0   | 0   |
| OTU246 | 2    | 1   | 0    | 0    | 0   | 0   | 0   | 0    | 0    | 0   | 0   | 0   |
| OTU247 | 0    | 0   | 0    | 594  | 1   | 80  | 0   | 3101 | 0    | 0   | 0   | 0   |
| OTU248 | 0    | 22  | 0    | 0    | 0   | 0   | 0   | 0    | 0    | 0   | 0   | 0   |
| OTU249 | 1    | 0   | 0    | 0    | 0   | 180 | 497 | 0    | 0    | 0   | 0   | 0   |
| OTU250 | 0    | 0   | 0    | 0    | 0   | 0   | 0   | 6    | 0    | 0   | 0   | 0   |
